# Supplementary material
Source: PubMed Central journal article supplement (PMC5293330)

**Supplementary Table S1: Key Baseline Characteristics for Subjects with Baseline Serum Calcification Propensity ( $T_{50}$ , min.) by Quintiles.**

|                               | Lower<br>(N=560)        | Lower Middle<br>(N=555) | Middle<br>(N=567)       | Upper Middle<br>(N=557) | Upper<br>(N=546)        |
|-------------------------------|-------------------------|-------------------------|-------------------------|-------------------------|-------------------------|
| <b>Demographics</b>           |                         |                         |                         |                         |                         |
| Age (yr)                      |                         |                         |                         |                         |                         |
| n                             | 560                     | 555                     | 567                     | 557                     | 546                     |
| Median<br>(p10, p90)          | 52.0<br>(32.0, 71.0)    | 54.0<br>(35.0, 73.0)    | 57.0<br>(35.0, 75.0)    | 55.0<br>(36.0, 73.0)    | 53.5<br>(34.0, 73.0)    |
| Age category -<br>n(%)        |                         |                         |                         |                         |                         |
| <65 years                     | 436 (77.9)              | 426 (76.8)              | 402 (70.9)              | 413 (74.1)              | 397 (72.7)              |
| >=65 years                    | 124 (22.1)              | 129 (23.2)              | 165 (29.1)              | 144 (25.9)              | 149 (27.3)              |
| Female sex –n(%)              | 203 (36.3)              | 234 (42.2)              | 228 (40.2)              | 227 (40.8)              | 240 (44.0)              |
| Race or ethnic<br>group –n(%) |                         |                         |                         |                         |                         |
| White                         | 274 (48.9)              | 311 (56.0)              | 336 (59.3)              | 350 (62.8)              | 328 (60.1)              |
| Black                         | 115 (20.5)              | 114 (20.5)              | 109 (19.2)              | 103 (18.5)              | 111 (20.3)              |
| Other                         | 171 (30.5)              | 130 (23.4)              | 122 (21.5)              | 104 (18.7)              | 107 (19.6)              |
| Region - n(%)                 |                         |                         |                         |                         |                         |
| United States                 | 211 (37.7)              | 212 (38.2)              | 194 (34.2)              | 162 (29.1)              | 163 (29.9)              |
| Europe                        | 102 (18.2)              | 178 (32.1)              | 207 (36.5)              | 240 (43.1)              | 218 (39.9)              |
| Latin America                 | 193 (34.5)              | 113 (20.4)              | 110 (19.4)              | 80 (14.4)               | 72 (13.2)               |
| Russia                        | 36 (6.4)                | 35 (6.3)                | 35 (6.2)                | 51 (9.2)                | 62 (11.4)               |
| Australia                     | 0 (0.0)                 | 0 (0.0)                 | 0 (0.0)                 | 0 (0.0)                 | 0 (0.0)                 |
| Canada                        | 18 (3.2)                | 17 (3.1)                | 21 (3.7)                | 24 (4.3)                | 31 (5.7)                |
| Permanent<br>Catheter         | 50 (8.9)                | 62 (11.2)               | 71 (12.5)               | 79 (14.2)               | 52 (9.5)                |
| Other                         | 15 (2.7)                | 18 (3.2)                | 11 (1.9)                | 7 (1.3)                 | 12 (2.2)                |
| Dialysate calcium<br>(mEq/L)  |                         |                         |                         |                         |                         |
| n                             | 560                     | 555                     | 567                     | 557                     | 545                     |
| Median (p10,<br>p90)          | 2.50<br>(2.25, 3.50)    | 2.50<br>(2.50, 3.50)    | 2.50<br>(2.25, 3.50)    | 2.50<br>(2.50, 3.50)    | 2.50<br>(2.50, 3.50)    |
| Blood pressure<br>(mm Hg)     |                         |                         |                         |                         |                         |
| Systolic                      |                         |                         |                         |                         |                         |
| n                             | 560                     | 554                     | 567                     | 556                     | 546                     |
| Median<br>(p10, p90)          | 140.0 (110.0,<br>176.0) | 140.0 (110.0,<br>180.0) | 140.0 (110.0,<br>176.0) | 140.0 (115.0,<br>178.0) | 140.0 (110.0,<br>171.0) |
| Diastolic                     |                         |                         |                         |                         |                         |
| n                             | 559                     | 554                     | 567                     | 556                     | 546                     |
| Median<br>(p10, p90)          | 80.0<br>(60.0, 100.0)   | 80.0<br>(61.0, 99.0)    | 80.0<br>(60.0, 100.0)   | 80.0<br>(60.0, 100.0)   | 80.0<br>(60.0, 99.0)    |
| ECG Result –<br>n(%)          |                         |                         |                         |                         |                         |
| Normal                        | 202 (36.1)              | 191 (34.4)              | 218 (38.4)              | 207 (37.2)              | 221 (40.5)              |
| Abnormal                      | 346 (61.8)              | 351 (63.2)              | 324 (57.1)              | 330 (59.2)              | 300 (54.9)              |
| Tobacco use -<br>n(%)         |                         |                         |                         |                         |                         |

|                                                   |                 |                 |                 |                 |                 |
|---------------------------------------------------|-----------------|-----------------|-----------------|-----------------|-----------------|
| Never                                             | 334 (59.6)      | 300 (54.1)      | 310 (54.7)      | 331 (59.4)      | 310 (56.8)      |
| Current                                           | 87 (15.5)       | 104 (18.7)      | 102 (18.0)      | 94 (16.9)       | 82 (15.0)       |
| Former                                            | 139 (24.8)      | 151 (27.2)      | 155 (27.3)      | 132 (23.7)      | 154 (28.2)      |
| <b>Medical History</b>                            |                 |                 |                 |                 |                 |
| History of diabetes –n(%)                         | 181 (32.3)      | 178 (32.1)      | 196 (34.6)      | 175 (31.4)      | 143 (26.2)      |
| Type 1                                            | 21 (3.8)        | 22 (4.0)        | 28 (4.9)        | 24 (4.3)        | 16 (2.9)        |
| Type 2                                            | 161 (28.8)      | 156 (28.1)      | 168 (29.6)      | 151 (27.1)      | 127 (23.3)      |
| History of cardiovascular disease –n(%)           | 533 (95.2)      | 527 (95.0)      | 536 (94.5)      | 535 (96.1)      | 508 (93.0)      |
| Hypertension                                      | 515 (92.0)      | 510 (91.9)      | 518 (91.4)      | 519 (93.2)      | 492 (90.1)      |
| Heart failure                                     | 133 (23.8)      | 134 (24.1)      | 130 (22.9)      | 112 (20.1)      | 121 (22.2)      |
| Peripheral vascular disease                       | 88 (15.7)       | 92 (16.6)       | 101 (17.8)      | 89 (16.0)       | 69 (12.6)       |
| CABG                                              | 45 (8.0)        | 33 (5.9)        | 45 (7.9)        | 40 (7.2)        | 31 (5.7)        |
| PCI                                               | 37 (6.6)        | 41 (7.4)        | 39 (6.9)        | 31 (5.6)        | 38 (7.0)        |
| Myocardial infarction                             | 77 (13.8)       | 63 (11.4)       | 69 (12.2)       | 67 (12.0)       | 58 (10.6)       |
| Stroke                                            | 45 (8.0)        | 48 (8.6)        | 66 (11.6)       | 49 (8.8)        | 33 (6.0)        |
| Transient ischemic attack                         | 21 (3.8)        | 20 (3.6)        | 28 (4.9)        | 28 (5.0)        | 26 (4.8)        |
| Amputation                                        | 37 (6.6)        | 39 (7.0)        | 30 (5.3)        | 32 (5.7)        | 24 (4.4)        |
| Atrial fibrillation                               | 53 (9.5)        | 60 (10.8)       | 76 (13.4)       | 52 (9.3)        | 67 (12.3)       |
| History of parathyroidectomy –n(%)                | 25 (4.5)        | 19 (3.4)        | 25 (4.4)        | 32 (5.7)        | 32 (5.9)        |
| History of fracture –n(%)                         | 125 (22.3)      | 114 (20.5)      | 97 (17.1)       | 106 (19.0)      | 101 (18.5)      |
| History of coronary artery disease–n(%)           | 143 (25.5)      | 129 (23.2)      | 141 (24.9)      | 131 (23.5)      | 110 (20.1)      |
| History of cardiac arrhythmia <sup>a</sup> – n(%) | 76 (13.6)       | 82 (14.8)       | 91 (16.0)       | 63 (11.3)       | 86 (15.8)       |
| Other cardiac disease history <sup>b</sup> – n(%) | 122 (21.8)      | 120 (21.6)      | 142 (25.0)      | 130 (23.3)      | 110 (20.1)      |
| History of revascularization <sup>c</sup> – n(%)  | 83 (14.8)       | 90 (16.2)       | 90 (15.9)       | 83 (14.9)       | 78 (14.3)       |
| History of dyslipidemia– n(%)                     | 208 (37.1)      | 206 (37.1)      | 221 (39.0)      | 228 (40.9)      | 179 (32.8)      |
| History of retinopathy– n(%)                      | 127 (22.7)      | 123 (22.2)      | 128 (22.6)      | 128 (23.0)      | 99 (18.1)       |
| <b>Laboratory parameters</b>                      |                 |                 |                 |                 |                 |
| iPTH (pg/mL) from central lab                     |                 |                 |                 |                 |                 |
| n                                                 | 560             | 555             | 567             | 557             | 546             |
| Median (p10, p90)                                 | 813 (392, 1893) | 708 (382, 1765) | 689 (377, 1694) | 689 (369, 1789) | 653 (345, 1505) |

|                                            |                              |                            |                         |                         |                         |
|--------------------------------------------|------------------------------|----------------------------|-------------------------|-------------------------|-------------------------|
| Serum calcification propensity (T50 min)   |                              |                            |                         |                         |                         |
| n                                          | 560                          | 555                        | 567                     | 557                     | 546                     |
| Median (p10, p90)                          | 109<br>(80, 131)             | 162<br>(142, 181)          | 213<br>(192, 232)       | 259<br>(240, 282)       | 329<br>(295, 406)       |
| Corrected calcium (mg/dL)                  |                              |                            |                         |                         |                         |
| n                                          | 560                          | 555                        | 567                     | 557                     | 546                     |
| Median (p10, p90)                          | 9.8<br>(9.0, 10.9)           | 9.7<br>(8.9, 10.7)         | 9.8<br>(8.9, 10.7)      | 9.8<br>(9.1, 10.7)      | 9.8<br>(9.2, 10.8)      |
| Phosphorus (mg/dL)                         |                              |                            |                         |                         |                         |
| n                                          | 560                          | 555                        | 567                     | 557                     | 546                     |
| Median (p10, p90)                          | 7.5<br>(5.9, 9.7)            | 6.7<br>(5.3, 8.6)          | 6.3<br>(5.0, 8.0)       | 5.8<br>(4.9, 7.3)       | 5.4<br>(4.6, 6.7)       |
| Ca x P (mg <sup>2</sup> /dL <sup>2</sup> ) |                              |                            |                         |                         |                         |
| n                                          | 560                          | 555                        | 567                     | 557                     | 546                     |
| Median (p10, p90)                          | 73.0<br>(56.5, 96.0)         | 64.2<br>(51.4, 83.8)       | 61.0<br>(49.4, 77.3)    | 56.4<br>(47.3, 71.8)    | 52.9<br>(44.2, 66.6)    |
| FGF23 (pg/mL)                              |                              |                            |                         |                         |                         |
| n                                          | 559                          | 551                        | 565                     | 555                     | 542                     |
| Median (p10, p90)                          | 10670.0<br>(1520.0, 24100.0) | 7030.0<br>(830.0, 20520.0) | 5640.0 (730.0, 19280.0) | 3690.0 (480.0, 15420.0) | 2655.0 (310.0, 13760.0) |
| 25(OH) <sub>2</sub> D (ng/mL)              |                              |                            |                         |                         |                         |
| n                                          | 558                          | 551                        | 564                     | 555                     | 543                     |
| Median (p10, p90)                          | 19.0<br>(9.0, 38.0)          | 17.0<br>(8.0, 37.0)        | 17.0<br>(7.0, 39.0)     | 18.0<br>(8.0, 37.0)     | 18.0<br>(8.0, 38.0)     |
| 1,25(OH) D (ng/L)                          |                              |                            |                         |                         |                         |
| n                                          | 547                          | 532                        | 538                     | 537                     | 517                     |
| Median (p10, p90)                          | 7.6<br>(4.9, 21.4)           | 7.7<br>(4.9, 23.5)         | 8.7<br>(4.9, 21.5)      | 9.2<br>(4.9, 25.4)      | 10.0<br>(4.9, 26.1)     |
| Alkaline phosphatase (U/L)                 |                              |                            |                         |                         |                         |
| n                                          | 556                          | 548                        | 562                     | 555                     | 544                     |
| Median (p10, p90)                          | 106.0<br>(64.0, 246.0)       | 101.0<br>(63.0, 248.0)     | 102.0<br>(63.0, 227.0)  | 113.0<br>(64.0, 258.0)  | 119.0<br>(69.0, 242.0)  |
| Bone alkaline phosphatase (µg/L)           |                              |                            |                         |                         |                         |
| n                                          | 556                          | 552                        | 564                     | 555                     | 545                     |
| Median (p10, p90)                          | 21.8<br>(11.1, 75.4)         | 20.8<br>(11.1, 68.2)       | 21.7<br>(10.9, 66.7)    | 23.5<br>(11.4, 68.9)    | 27.3<br>(13.1, 75.2)    |
| Bone alkaline phosphatase > 20.9 µg/L (%)  | 296 (52.9)                   | 274 (49.4)                 | 303 (53.4)              | 320 (57.5)              | 361 (66.1)              |
| N-telopeptide (nmol/L)                     |                              |                            |                         |                         |                         |
| n                                          | 554                          | 542                        | 554                     | 543                     | 534                     |

|                       |                      |                      |                      |                      |                      |
|-----------------------|----------------------|----------------------|----------------------|----------------------|----------------------|
| Median (p10, p90)     | 316.9 (95.1, 1288.3) | 266.4 (76.0, 889.7)  | 236.1 (77.8, 822.8)  | 246.7 (83.6, 838.6)  | 244.3 (74.3, 815.2)  |
| Hemoglobin (g/dL)     |                      |                      |                      |                      |                      |
| n                     | 509                  | 494                  | 498                  | 510                  | 500                  |
| Median (p10, p90)     | 11.5 (9.4, 13.4)     | 11.7 (10.1, 13.5)    | 11.9 (10.1, 13.8)    | 11.8 (10.1, 13.5)    | 11.7 (9.9, 13.6)     |
| Albumin (g/dL)        |                      |                      |                      |                      |                      |
| n                     | 560                  | 555                  | 567                  | 557                  | 546                  |
| Median (p10, p90)     | 3.6 (3.2, 4.0)       | 3.6 (3.2, 4.0)       | 3.7 (3.2, 4.0)       | 3.7 (3.2, 4.1)       | 3.7 (3.3, 4.2)       |
| Bicarbonate (mEq/L)   |                      |                      |                      |                      |                      |
| n                     | 549                  | 535                  | 550                  | 551                  | 535                  |
| Median (p10, p90)     | 20.0 (15.5, 25.3)    | 19.8 (15.6, 25.4)    | 19.8 (15.3, 25.3)    | 20.3 (16.0, 24.9)    | 21.4 (16.9, 26.6)    |
| BUN (mg/dL)           |                      |                      |                      |                      |                      |
| n                     | 557                  | 549                  | 563                  | 556                  | 544                  |
| Median (p10, p90)     | 66.0 (44.0, 89.0)    | 64.0 (41.0, 86.0)    | 61.0 (41.0, 87.0)    | 59.0 (41.0, 82.0)    | 55.0 (36.0, 80.0)    |
| Creatinine (mg/dL)    |                      |                      |                      |                      |                      |
| n                     | 557                  | 549                  | 563                  | 556                  | 544                  |
| Median (p10, p90)     | 10.4 (7.4, 14.2)     | 10.1 (6.9, 13.9)     | 10.0 (6.7, 14.2)     | 10.0 (6.6, 13.7)     | 9.6 (6.1, 13.7)      |
| Glucose (mg/dL)       |                      |                      |                      |                      |                      |
| n                     | 530                  | 522                  | 536                  | 538                  | 520                  |
| Median (p10, p90)     | 94.0 (76.0, 167.0)   | 97.0 (77.0, 181.0)   | 98.0 (76.0, 176.0)   | 97.0 (76.0, 168.0)   | 95.0 (78.0, 167.5)   |
| Cholesterol (mg/dL)   |                      |                      |                      |                      |                      |
| Total                 |                      |                      |                      |                      |                      |
| n                     | 556                  | 550                  | 564                  | 557                  | 543                  |
| Median (p10, p90)     | 159.0 (114.0, 222.0) | 162.0 (115.0, 221.5) | 162.0 (119.0, 222.0) | 166.0 (119.0, 225.0) | 166.0 (120.0, 236.0) |
| LDL                   |                      |                      |                      |                      |                      |
| n                     | 533                  | 519                  | 535                  | 529                  | 504                  |
| Median (p10, p90)     | 87.0 (51.0, 140.0)   | 86.0 (48.0, 135.0)   | 86.0 (50.0, 142.0)   | 87.0 (47.0, 141.0)   | 89.5 (47.0, 140.0)   |
| HDL                   |                      |                      |                      |                      |                      |
| n                     | 553                  | 547                  | 558                  | 555                  | 535                  |
| Median (p10, p90)     | 40.0 (27.0, 60.0)    | 40.0 (26.0, 62.0)    | 42.0 (28.0, 61.0)    | 40.0 (27.0, 61.0)    | 42.0 (28.0, 67.0)    |
| Triglycerides (mg/dL) |                      |                      |                      |                      |                      |
| n                     | 556                  | 550                  | 564                  | 557                  | 543                  |
| Median (p10, p90)     | 134.0 (60.0, 289.0)  | 139.5 (61.0, 321.5)  | 139.5 (63.0, 316.0)  | 152.0 (71.0, 310.0)  | 137.0 (62.0, 335.0)  |
| Uric acid (mg/dL)     |                      |                      |                      |                      |                      |
| n                     | 557                  | 549                  | 563                  | 556                  | 544                  |
| Median                | 6.4                  | 6.5                  | 6.4                  | 6.4                  | 6.2                  |

|                                                         |            |            |            |            |            |
|---------------------------------------------------------|------------|------------|------------|------------|------------|
| (p10, p90)                                              | (4.9, 8.3) | (4.8, 8.3) | (4.9, 8.5) | (4.9, 8.3) | (4.6, 8.1) |
| Dialysis dose $\geq 1.2$ spKt/V or $\geq 65$ URR - n(%) | 476 (85.0) | 471 (84.9) | 469 (82.7) | 466 (83.7) | 479 (87.7) |
| <b>Medications (%)</b>                                  |            |            |            |            |            |
| Vitamin D use                                           | 280 (50.0) | 299 (53.9) | 363 (64.0) | 370 (66.4) | 340 (62.3) |
| Vitamin D sterol                                        | 274 (48.9) | 291 (52.4) | 354 (62.4) | 362 (65.0) | 329 (60.3) |
| Nutritional vitamin D                                   | 12 (2.1)   | 18 (3.2)   | 22 (3.9)   | 19 (3.4)   | 22 (4.0)   |
| Phosphate binder use                                    | 502 (89.6) | 492 (88.6) | 515 (90.8) | 497 (89.2) | 475 (87.0) |
| Calcium-containing                                      | 326 (58.2) | 287 (51.7) | 308 (54.3) | 308 (55.3) | 289 (52.9) |
| Non-calcium containing                                  | 176 (31.4) | 205 (36.9) | 207 (36.5) | 189 (33.9) | 186 (34.1) |
| Beta-adrenergic antagonists                             | 285 (50.9) | 264 (47.6) | 268 (47.3) | 234 (42.0) | 217 (39.7) |
| ACE-inhibitors/Angiotension receptor blockers           | 274 (48.9) | 242 (43.6) | 237 (41.8) | 229 (41.1) | 225 (41.2) |
| Anti-platelet agents                                    | 183 (32.7) | 212 (38.2) | 210 (37.0) | 213 (38.2) | 196 (35.9) |
| Statins                                                 | 155 (27.7) | 151 (27.2) | 189 (33.3) | 195 (35.0) | 159 (29.1) |
| Erythropoietin                                          | 475 (84.8) | 476 (85.8) | 495 (87.3) | 465 (83.5) | 479 (87.7) |
| Iron supplements                                        | 326 (58.2) | 331 (59.6) | 330 (58.2) | 348 (62.5) | 293 (53.7) |

**Supplementary Table S2:** List of variables used for the Cox regression analysis.

1. Covariates used in univariate model for all endpoints

| Variable  | Label                                                            |
|-----------|------------------------------------------------------------------|
| age       | Age (years)                                                      |
| sex       | Sex                                                              |
| racegr1   | Race group                                                       |
| bmib      | Baseline BMI (kg/m <sup>2</sup> )                                |
| sbpb_t    | Blood pressure – systolic per 10 mmHg increase                   |
| dbpb_t    | Blood pressure – diastolic per 10 mmHg increase                  |
| hxmi      | History of myocardial infarction                                 |
| hxhf      | History of heart failure                                         |
| hxcad     | History of coronary artery disease                               |
| hxcarr    | History of cardiac arrhythmia                                    |
| hxhpt     | History of hypertension                                          |
| hxotcd    | Other cardiac disease history                                    |
| hxstr     | History of stroke                                                |
| hxtia     | History of transient ischemic attack                             |
| hxpvd     | History of peripheral vascular disease                           |
| hxrvas    | History of revascularization                                     |
| hxdys     | History of dyslipidemia                                          |
| rhdduryr  | Dialysis vintage (years)                                         |
| blcaconc  | Baseline Dialysate calcium conc. (mEq/L)                         |
| blvdf1    | Baseline vitamin D use                                           |
| blpbcafl  | Baseline calcium-containing phosphate binder use                 |
| statinfl  | Baseline statin use                                              |
| t50_min_d | Baseline serum calcification propensity scores per 1 SD decrease |
| hgb_ob    | Baseline hemoglobin (g/dL)                                       |

|           |                                    |
|-----------|------------------------------------|
| ldl_ob    | LDL at baseline (mg/dL)            |
| hdl_ob    | HDL at baseline (mg/dL)            |
| chol_t_ob | Baseline total cholesterol (mg/dL) |
| hxsmk     | Baseline tobacco use               |

**2. Significant variables (probchisq<0.25) picked from univariate model and were included in the backward model per endpoint (variable t50\_min\_d is forced in the final model if not been selected for all endpoints)**

1.) Primary composite endpoint

| <b>Variable</b> | <b>Label</b>                                    |
|-----------------|-------------------------------------------------|
| trt01pn         | Planned treatment                               |
| age             | Age (years)                                     |
| racegr1         | Race group                                      |
| bmib            | Baseline BMI (kg/m <sup>2</sup> )               |
| sbpb_t          | Blood pressure – systolic per 10 mmHg increase  |
| dbpb_t          | Blood pressure – diastolic per 10 mmHg increase |
| hxmi            | History of myocardial infarction                |
| hxhf            | History of heart failure                        |
| hxcad           | History of coronary artery disease              |
| hxcarr          | History of cardiac arrhythmia                   |
| hxhpt           | History of hypertension                         |
| hxotcd          | Other cardiac disease history                   |
| hxstr           | History of stroke                               |
| hxtia           | History of transient ischemic attack            |
| hxpvd           | History of peripheral vascular disease          |
| hxrvas          | History of revascularization                    |
| hxdys           | History of dyslipidemia                         |
| rhdduryr        | Dialysis vintage (years)                        |

|           |                                                                  |
|-----------|------------------------------------------------------------------|
| blvdf1    | Baseline vitamin D use                                           |
| blpbcaf1  | Baseline calcium-containing phosphate binder use                 |
| statinf1  | Baseline statin use                                              |
| t50_min_d | Baseline serum calcification propensity scores per 1 SD decrease |
| hdl_ob    | HDL at baseline (mg/dL)                                          |
| hxsmk     | Baseline tobacco use                                             |

2.) All-cause mortality

| <b>Variable</b> | <b>Label</b>                                                     |
|-----------------|------------------------------------------------------------------|
| trt01pn         | Planned treatment                                                |
| age             | Age (years)                                                      |
| racegr1         | Race group                                                       |
| bmib            | Baseline BMI (kg/m <sup>2</sup> )                                |
| dbpb_t          | Blood pressure - diastolic per 10 mmHg increase                  |
| hxmi            | History of myocardial infarction                                 |
| hxhf            | History of heart failure                                         |
| hxcad           | History of coronary artery disease                               |
| hxcarr          | History of cardiac arrhythmia                                    |
| hxotcd          | Other cardiac disease history                                    |
| hxstr           | History of stroke                                                |
| hxtia           | History of transient ischemic attack                             |
| hxpvd           | History of peripheral vascular disease                           |
| hxrvas          | History of revascularization                                     |
| rhdduryr        | Dialysis vintage (years)                                         |
| blvdf1          | Baseline vitamin D use                                           |
| blpbcaf1        | Baseline calcium-containing phosphate binder use                 |
| t50_min_d       | Baseline serum calcification propensity scores per 1 SD decrease |
| hdl_ob          | HDL at baseline (mg/dL)                                          |



|          |                                    |
|----------|------------------------------------|
| cholt_ob | Baseline total cholesterol (mg/dL) |
| hxsmk    | Baseline tobacco use               |

### 3.) Myocardial infarction

| <b>Variable</b> | <b>Label</b>                                                     |
|-----------------|------------------------------------------------------------------|
| trt01pn         | Planned treatment                                                |
| age             | Age (years)                                                      |
| sex             | Sex                                                              |
| racegr1         | Race group                                                       |
| sbpb_t          | Blood pressure – systolic per 10 mmHg increase                   |
| dbpb_t          | Blood pressure – diastolic per 10 mmHg increase                  |
| hxmi            | History of myocardial infarction                                 |
| hxhf            | History of heart failure                                         |
| hxcad           | History of coronary artery disease                               |
| hxcarr          | History of cardiac arrhythmia                                    |
| hxhpt           | History of hypertension                                          |
| hxotcd          | Other cardiac disease history                                    |
| hxstr           | History of stroke                                                |
| hxtia           | History of transient ischemic attack                             |
| hxpvd           | History of peripheral vascular disease                           |
| hxrvas          | History of revascularization                                     |
| hxdys           | History of dyslipidemia                                          |
| blvdf1          | Baseline vitamin D use                                           |
| statinf1        | Baseline statin use                                              |
| t50_min_d       | Baseline serum calcification propensity scores per 1 SD decrease |
| ldl_ob          | LDL at baseline (mg/dL)                                          |
| cholt_ob        | Baseline total cholesterol (mg/dL)                               |
| hxsmk           | Baseline tobacco use                                             |

4.) Peripheral vascular event

| <b>Variable</b> | <b>Label</b>                                                     |
|-----------------|------------------------------------------------------------------|
| trt01pn         | Planned treatment                                                |
| age             | Age (years)                                                      |
| sex             | Sex                                                              |
| racegr1         | Race group                                                       |
| dbpb_t          | Blood pressure – diastolic per 10 mmHg increase                  |
| hxmi            | History of myocardial infarction                                 |
| hxhf            | History of heart failure                                         |
| hxcad           | History of coronary artery disease                               |
| hxcarr          | History of cardiac arrhythmia                                    |
| hxotcd          | Other cardiac disease history                                    |
| hxstr           | History of stroke                                                |
| hxtia           | History of transient ischemic attack                             |
| hxpvd           | History of peripheral vascular disease                           |
| hxrvas          | History of revascularization                                     |
| hxdys           | History of dyslipidemia                                          |
| rhdduryr        | Dialysis vintage (years)                                         |
| t50_min_d       | Baseline serum calcification propensity scores per 1 SD decrease |
| ldl_ob          | LDL at baseline (mg/dL)                                          |
| hdl_ob          | HDL at baseline (mg/dL)                                          |
| chol_t_ob       | Baseline total cholesterol (mg/dL)                               |
| hxsmk           | Baseline tobacco use                                             |

5.) Cardiovascular mortality

| <b>Variable</b> | <b>Label</b>      |
|-----------------|-------------------|
| trt01pn         | Planned treatment |

|           |                                                                  |
|-----------|------------------------------------------------------------------|
| age       | Age (years)                                                      |
| racegr1   | Race group                                                       |
| dbpb_t    | Blood pressure – diastolic per 10 mmHg increase                  |
| hxmi      | History of myocardial infarction                                 |
| hxhf      | History of heart failure                                         |
| hxcad     | History of coronary artery disease                               |
| hxcarr    | History of cardiac arrhythmia                                    |
| hxotcd    | Other cardiac disease history                                    |
| hxstr     | History of stroke                                                |
| hxtia     | History of transient ischemic attack                             |
| hxpvd     | History of peripheral vascular disease                           |
| hxrvas    | History of revascularization                                     |
| blvdf1    | Baseline vitamin D use                                           |
| blpbcaf1  | Baseline calcium-containing phosphate binder use                 |
| t50_min_d | Baseline serum calcification propensity scores per 1 SD decrease |
| cholt_ob  | Baseline total cholesterol (mg/dL)                               |
| hxsmk     | Baseline tobacco use                                             |

6.) Tertiary cardiovascular composite

| <b>Variable</b> | <b>Label</b>                                    |
|-----------------|-------------------------------------------------|
| trt01pn         | Planned treatment                               |
| age             | Age (years)                                     |
| racegr1         | Race group                                      |
| sbpb_t          | Blood pressure – systolic per 10 mmHg increase  |
| dbpb_t          | Blood pressure – diastolic per 10 mmHg increase |
| hxmi            | History of myocardial infarction                |
| hxhf            | History of heart failure                        |
| hxcad           | History of coronary artery disease              |

|           |                                                                  |
|-----------|------------------------------------------------------------------|
| hxcarr    | History of cardiac arrhythmia                                    |
| hxhpt     | History of hypertension                                          |
| hxotcd    | Other cardiac disease history                                    |
| hxstr     | History of stroke                                                |
| hxtia     | History of transient ischemic attack                             |
| hxpvd     | History of peripheral vascular disease                           |
| hxrvas    | History of revascularization                                     |
| hxdys     | History of dyslipidemia                                          |
| blvdf1    | Baseline vitamin D use                                           |
| blpbcaf1  | Baseline calcium-containing phosphate binder use                 |
| statinf1  | Baseline statin use                                              |
| t50_min_d | Baseline serum calcification propensity scores per 1 SD decrease |
| hxsmk     | Baseline tobacco use                                             |

**3. Variables selected from the backward model and were included in the final model per endpoint (variable t50\_min\_d is forced in the final model if not been selected for all endpoints)**

1.) Primary composite endpoint

| <b>Variable</b> | <b>Label</b>                         |
|-----------------|--------------------------------------|
| trt01pn         | Planned treatment                    |
| age             | Age (years)                          |
| hxmi            | History of myocardial infarction     |
| hxhf            | History of heart failure             |
| hxcad           | History of coronary artery disease   |
| hxcarr          | History of cardiac arrhythmia        |
| hxotcd          | Other cardiac disease history        |
| hxstr           | History of stroke                    |
| hxtia           | History of transient ischemic attack |

|           |                                                                  |
|-----------|------------------------------------------------------------------|
| hxpvd     | History of peripheral vascular disease                           |
| rhdduryr  | Dialysis vintage (years)                                         |
| blvdf1    | Baseline vitamin D use                                           |
| statinfl  | Baseline statin use                                              |
| t50_min_d | Baseline serum calcification propensity scores per 1 SD decrease |
| hdl_ob    | HDL at baseline (mg/dL)                                          |
| hxsmk     | Baseline tobacco use                                             |

## 2.) All-cause mortality

| <b>Variable</b> | <b>Label</b>                                                     |
|-----------------|------------------------------------------------------------------|
| trt01pn         | Planned treatment                                                |
| age             | Age (years)                                                      |
| hxmi            | History of myocardial infarction                                 |
| hxhf            | History of heart failure                                         |
| hxcarr          | History of cardiac arrhythmia                                    |
| hxotcd          | Other cardiac disease history                                    |
| hxstr           | History of stroke                                                |
| hxtia           | History of transient ischemic attack                             |
| hxpvd           | History of peripheral vascular disease                           |
| rhdduryr        | Dialysis vintage (years)                                         |
| blvdf1          | Baseline vitamin D use                                           |
| t50_min_d       | Baseline serum calcification propensity scores per 1 SD decrease |
| hdl_ob          | HDL at baseline (mg/dL)                                          |
| chol_t_ob       | Baseline total cholesterol (mg/dL)                               |
| hxsmk           | Baseline tobacco use                                             |

## 3.) Myocardial infarction

| <b>Variable</b> | <b>Label</b> |
|-----------------|--------------|
|-----------------|--------------|

|           |                                                                  |
|-----------|------------------------------------------------------------------|
| trt01pn   | Planned treatment                                                |
| age       | Age (years)                                                      |
| hxmi      | History of myocardial infarction                                 |
| hxhpt     | History of hypertension                                          |
| hxotcd    | Other cardiac disease history                                    |
| hxtia     | History of transient ischemic attack                             |
| hxpvd     | History of peripheral vascular disease                           |
| t50_min_d | Baseline serum calcification propensity scores per 1 SD decrease |
| ldl_ob    | LDL at baseline (mg/dL)                                          |

4.) Peripheral vascular event

| <b>Variable</b> | <b>Label</b>                                                     |
|-----------------|------------------------------------------------------------------|
| trt01pn         | Planned treatment                                                |
| age             | Age (years)                                                      |
| sex             | Sex                                                              |
| racegr1         | Race group                                                       |
| hxcad           | History of coronary artery disease                               |
| hxcarr          | History of cardiac arrhythmia                                    |
| hxtia           | History of transient ischemic attack                             |
| hxpvd           | History of peripheral vascular disease                           |
| rhdduryr        | Dialysis vintage (years)                                         |
| t50_min_d       | Baseline serum calcification propensity scores per 1 SD decrease |
| ldl_ob          | LDL at baseline (mg/dL)                                          |
| hxsmk           | Baseline tobacco use                                             |

5.) Cardiovascular mortality

| <b>Variable</b> | <b>Label</b>      |
|-----------------|-------------------|
| trt01pn         | Planned treatment |

|           |                                                                  |
|-----------|------------------------------------------------------------------|
| age       | Age (years)                                                      |
| hxhf      | History of heart failure                                         |
| hxcad     | History of coronary artery disease                               |
| hxotcd    | Other cardiac disease history                                    |
| hxstr     | History of stroke                                                |
| hxtia     | History of transient ischemic attack                             |
| hxpvd     | History of peripheral vascular disease                           |
| blvdf1    | Baseline vitamin D use                                           |
| t50_min_d | Baseline serum calcification propensity scores per 1 SD decrease |
| hxsmk     | Baseline tobacco use                                             |

6.) Tertiary cardiovascular composite

trt01pn age cad dys hf hxsmk otcd pvd sbpb\_t str t50\_min\_d vdf1

| <b>Variable</b> | <b>Label</b>                                                     |
|-----------------|------------------------------------------------------------------|
| trt01pn         | Planned treatment                                                |
| age             | Age (years)                                                      |
| sbpb_t          | Blood pressure - systolic per 10 mmHg increase                   |
| hxhf            | History of heart failure                                         |
| hxcad           | History of coronary artery disease                               |
| hxotcd          | Other cardiac disease history                                    |
| hxstr           | History of stroke                                                |
| hxpvd           | History of peripheral vascular disease                           |
| hdys            | History of dyslipidemia                                          |
| blvdf1          | Baseline vitamin D use                                           |
| t50_min_d       | Baseline serum calcification propensity scores per 1 SD decrease |
| hxsmk           | Baseline tobacco use                                             |

**Supplementary Table S3:** Baseline demographics (clinical data, laboratory parameters and medications) of all EVOLVE patients and the T<sub>50</sub> cohort.

| <b>Demographics</b>                      | <b>All EVOLVE Patients<br/>(N = 3883)</b> | <b>T<sub>50</sub> Cohort*<br/>(N = 2785)</b> |
|------------------------------------------|-------------------------------------------|----------------------------------------------|
| <b>Clinical data</b>                     |                                           |                                              |
| Blood pressure, mmHg                     |                                           |                                              |
| Systolic                                 | 140 (110-177)                             | 140 (110-177)                                |
| Diastolic                                | 80 (60-100)                               | 80 (60-100)                                  |
| Diabetes, %                              | 33.6                                      | 31.4                                         |
| Type 1                                   | 4.0                                       | 4.0                                          |
| Type 2                                   | 29.6                                      | 27.4                                         |
| Tobacco use, %                           |                                           |                                              |
| Never                                    | 56.2                                      | 56.9                                         |
| Former                                   | 16.3                                      | 16.8                                         |
| Current                                  | 27.4                                      | 26.2                                         |
| History of cardiovascular disease, %     | 95.0                                      | 94.8                                         |
| Hypertension                             | 92.1                                      | 91.7                                         |
| Heart failure                            | 23.3                                      | 22.6                                         |
| Peripheral vascular disease              | 16.4                                      | 15.8                                         |
| CABG                                     | 7.4                                       | 7.0                                          |
| PCI                                      | 6.7                                       | 6.7                                          |
| Myocardial infarction                    | 12.4                                      | 12.0                                         |
| Stroke                                   | 9.1                                       | 8.7                                          |
| Transient ischemic attack                | 4.5                                       | 4.4                                          |
| Amputation                               | 6.4                                       | 5.8                                          |
| Atrial fibrillation                      | 11.0                                      | 11.1                                         |
| <b>Laboratory parameters</b>             |                                           |                                              |
| iPTH, pg/mL                              | 693 (363-1694)                            | 705 (371-1734)                               |
| Corrected calcium, mg/dL                 | 9.8 (9.0-10.7)                            | 9.8 (9.0-10.7)                               |
| Serum phosphorus, mg/dL                  | 6.2 (4.9-8.4)                             | 6.3 (4.9-8.4)                                |
| Ca x P, mg <sup>2</sup> /dL <sup>2</sup> | 60.7 (47.8-81.9)                          | 60.8 (48.1-82.3)                             |
| FGF23, pg/mL                             |                                           | 5675 (590-19400)                             |
| 25(OH) <sub>2</sub> D, ng/mL             | 17 (8-37)                                 | 18 (8-38)                                    |
| 1,25 (OH) <sub>2</sub> D, pg/mL          | 8.8 (4.9-23.5)                            | 8.5 (4.9-23.5)                               |
| Bone-specific alkaline phosphatase, µg/L | 23.03 (11.51-68.00)                       | 22.88 (11.36-70.21)                          |
| N-telopeptide, nmol/L                    | 255.2 (80.5-882.5)                        | 261 (79.4-931.0)                             |
| Hemoglobin, g/dL                         | 11.8 (10.0-13.6)                          | 11.7 (9.9-13.5)                              |
| Albumin, g/dL                            | 3.7 (3.2-4.1)                             | 3.7 (3.2-4.1)                                |
| Bicarbonate, mEq/L                       | 20.3 (15.7-25.5)                          | 20.3 (15.8-25.5)                             |
| BUN, mg/dL                               | 61.0 (40.0-85.0)                          | 61 (40-86)                                   |
| Creatinine, mg/dL                        | 9.9 (6.7-13.9)                            | 10 (6.7-13.9)                                |
| Glucose, mg/dL                           | 97 (77-177)                               | 96 (76-170)                                  |
| Cholesterol, mg/dL                       |                                           |                                              |
| Total                                    | 162 (115-223)                             | 163 (116-225)                                |
| LDL                                      | 86 (48-138)                               | 87 (49-140)                                  |



|                                                 |               |               |
|-------------------------------------------------|---------------|---------------|
| HDL                                             | 41 (27-62)    | 41 (27-62)    |
| Triglycerides                                   | 139 (62-313)  | 140 (63-315)  |
| Uric acid, mg/dL                                | 6.4 (4.8-6.3) | 6.4 (4.8-8.3) |
|                                                 |               |               |
| <b>Medications, %</b>                           |               |               |
| Vitamin D use                                   | 59.5          | 59.3          |
| Vitamin D sterol                                | 58.2          | 57.8          |
| Nutritional vitamin D                           | 2.9           | 3.3           |
| Phosphate binder use                            | 88.4          | 89.1          |
| Calcium-containing                              | 53.1          | 54.5          |
| Non-calcium containing                          | 35.3          | 34.6          |
| Beta-adrenergic antagonists                     | 46.9          | 45.5          |
| ACE-inhibitors/Angiotensin II receptor blockers | 43.8          | 43.3          |
| Anti-platelet agents                            | 37.9          | 36.4          |
| Statins                                         | 32.5          | 30.5          |
| Erythropoietin                                  | 85.0          | 85.8          |
| Iron supplements                                | 56.9          | 58.5          |

Data are given as median (p10-p90) unless stated otherwise.

CABG = coronary artery bypass graft, PCI = percutaneous coronary intervention, iPTH = intact parathyroid hormone, FGF = fibroblast growth factor, BUN = blood urea nitrogen, LDL = low density lipoprotein, HDL = high density lipoprotein, ACE = angiotensin converting enzyme

\*Mean (SD) T<sub>50</sub> was 215 (84) mins in the T<sub>50</sub> cohort.

**Supplementary Table S4:** Baseline demographics (clinical data, laboratory parameters and medications) in the placebo and cinacalcet groups of the T<sub>50</sub> cohort.

| <b>Demographics</b>                  | <b>Placebo<br/>(N=1366)</b> | <b>Cinacalcet<br/>(N=1419)</b> |
|--------------------------------------|-----------------------------|--------------------------------|
| Region, %                            |                             |                                |
| United States                        | 33.5                        | 34.1                           |
| Europe                               | 34.2                        | 33.7                           |
| Latin America                        | 20.5                        | 20.3                           |
| Russia                               | 7.9                         | 7.8                            |
| Australia                            | 0.0                         | 0.0                            |
| Canada                               | 3.9                         | 4.1                            |
| Current Dialysis Access, %           |                             |                                |
| Natural Fistula                      | 73.4                        | 72.2                           |
| Graft                                | 13.0                        | 14.3                           |
| Permanent Catheter                   | 11.0                        | 11.5                           |
| Other                                | 2.5                         | 2.0                            |
| Dialysate calcium, mEq/L             | 2.50 (2.50-3.50)            | 2.50 (2.50-3.50)               |
| Tobacco use, %                       |                             |                                |
| Never                                | 56.9                        | 56.9                           |
| Former                               | 16.6                        | 17.1                           |
| Current                              | 26.5                        | 26.0                           |
| History of diabetes, %               |                             |                                |
| Type 1                               | 3.7                         | 4.3                            |
| Type 2                               | 27.2                        | 27.5                           |
| History of cardiovascular disease, % |                             |                                |
| Hypertension                         | 91.9                        | 91.6                           |
| Heart failure                        | 22.3                        | 22.9                           |
| Peripheral vascular disease          | 15.4                        | 16.3                           |
| CABG                                 | 6.7                         | 7.2                            |
| PCI                                  | 6.7                         | 6.7                            |
| Myocardial infarction                | 12.1                        | 11.9                           |
| Stroke                               | 7.6                         | 9.7                            |
| Transient ischemic attack            | 4.8                         | 4.0                            |
| Amputation                           | 5.4                         | 6.2                            |
| Atrial fibrillation                  | 10.2                        | 12.0                           |

|                                                    |                      |                      |
|----------------------------------------------------|----------------------|----------------------|
| History of parathyroidectomy, %                    | 4.7                  | 4.8                  |
| History of fracture, %                             | 18.7                 | 20.3                 |
| History of coronary artery disease, %              | 22.5                 | 24.5                 |
| History of cardiac arrhythmia <sup>a</sup> , %     | 13.9                 | 14.8                 |
| Other cardiac disease history <sup>b</sup> , % (%) | 23.0                 | 22.0                 |
| History of revascularization <sup>c</sup> , %      | 15.3                 | 15.0                 |
| History of dyslipidemia, %                         | 36.9                 | 37.9                 |
| History of retinopathy, %                          | 21.2                 | 22.4                 |
|                                                    |                      |                      |
| <b>Laboratory parameters</b>                       |                      |                      |
| iPTH, pg/mL                                        | 707.0 (371.0-1755.0) | 697.5 (372.0-1717.0) |
| Corrected calcium, mg/dL                           | 9.8 (9.0-10.7)       | 9.8 (9.0-10.7)       |
| Serum phosphorus, mg/dL                            | 6.3 (4.9-8.3)        | 6.2 (4.9-8.4)        |
| Ca x P, mg <sup>2</sup> /dL <sup>2</sup>           | 60.9 (48.2-82.0)     | 60.7 (48.0-82.4)     |
| FGF23, pg/mL                                       | 5610 (580-19390)     | 5750 (590-19390)     |
| 25(OH) <sub>2</sub> D, ng/mL                       | 17.0 (8.0-37.0)      | 18.0 (8.0-38.0)      |
| 1,25 (OH) <sub>2</sub> D, pg/mL                    | 8.5 (4.9-24.5)       | 8.6 (4.9-22.2)       |
| Bone-specific alkaline phosphatase, µg/L           | 109 (64-262)         | 106 (65-226)         |
| N-telopeptide, nmol/L                              | 271.0 (82.1-965.6)   | 248.5 (77.8-871.0)   |
| Hemoglobin, g/dL                                   | 11.7 (9.9-13.4)      | 11.7 (9.9-13.7)      |
| Albumin, g/dL                                      | 3.7 (3.2-4.1)        | 3.7 (3.2-4.1)        |
| Bicarbonate, mEq/L                                 | 20.3 (15.8-25.4)     | 20.3 (15.8-25.6)     |
| BUN, mg/dL                                         | 61.0 (40.0-85.0)     | 61.0 (40.0-86.0)     |
| Creatinine, mg/dL                                  | 10.0 (6.7-13.9)      | 10.0 (6.7-13.9)      |
| Glucose, mg/dL                                     | 95.0 (76.0-172.0)    | 97.0 (77.0-167.0)    |
| Cholesterol, mg/dL                                 |                      |                      |
| Total                                              | 162.0 (117.0-223.0)  | 164.0 (116.0-225.5)  |
| LDL                                                | 86.0 (48.0-140.0)    | 87.0 (51.0-138.0)    |
| HDL                                                | 41.0 (27.0-62.0)     | 41.0 (27.0-62.0)     |
| Triglycerides                                      | 139.0 (63.0-315.5)   | 142.0 (63.0-312.5)   |
| Uric acid, mg/dL                                   | 6.3 (4.8-8.3)        | 6.4 (4.8-8.4)        |
|                                                    |                      |                      |
| <b>Medications, %</b>                              |                      |                      |
| Vitamin D use                                      | 59.2                 | 59.4                 |
| Vitamin D sterol                                   | 58.1                 | 57.5                 |

|                                                 |      |      |
|-------------------------------------------------|------|------|
| Nutritional vitamin D                           | 3.0  | 3.7  |
| Phosphate binder use                            | 88.0 | 90.2 |
| Calcium-containing                              | 53.7 | 55.4 |
| Non-calcium containing                          | 34.3 | 34.8 |
| Beta-adrenergic antagonists                     | 47.0 | 44.0 |
| ACE-inhibitors/Angiotensin II receptor blockers | 44.9 | 41.7 |
| Anti-platelet agents                            | 36.4 | 36.5 |
| Statins                                         | 31.2 | 29.7 |
| Erythropoietin                                  | 86.8 | 84.9 |
| Iron supplements                                | 59.7 | 57.0 |

Data are given as median (p10-p90) unless stated otherwise

<sup>a</sup> History of cardiac arrhythmia includes chronic atrial fibrillation/flutter, paroxysmal atrial fibrillation, ventricular tachycardia/fibrillation, automatic implantable cardioverter-defibrillator, pacemaker.

<sup>b</sup> Other cardiac disease history includes valvular heart disease and angina.

<sup>c</sup> History of revascularization includes coronary artery bypass graft, percutaneous coronary intervention, revascularization of carotid artery, peripheral artery, renal artery and aortic aneurysm repair.

CABG = coronary artery bypass graft, PCI = percutaneous coronary intervention, iPTH = intact parathyroid hormone, FGF = fibroblast growth factor, BUN = blood urea nitrogen, LDL = low density lipoprotein, HDL = high density lipoprotein, ACE = angiotensin converting enzyme

**Supplementary Table S5:** Hazard ratios of baseline covariates adjusted for the primary composite endpoint

|                                                                   |         | Parameter Estimate | SE    | Chi-square Statistic | p-value | Hazard Ratio | 95% CI                |
|-------------------------------------------------------------------|---------|--------------------|-------|----------------------|---------|--------------|-----------------------|
| Treatment (Cinacalcet vs Placebo)                                 |         | -0.097             | 0.056 | 3.02                 | 0.082   | 0.907        | (0.813, 1.013)        |
| Age (years)                                                       |         | 0.033              | 0.002 | 179.83               | <0.001  | 1.034        | (1.029, 1.039)        |
| History of myocardial infarction                                  |         | 0.187              | 0.086 | 4.71                 | 0.030   | 1.205        | (1.018, 1.426)        |
| History of coronary artery disease                                |         | 0.299              | 0.077 | 15.24                | <0.001  | 1.349        | (1.161, 1.567)        |
| History of cardiac arrhythmia <sup>a</sup>                        |         | 0.252              | 0.074 | 11.69                | <0.001  | 1.286        | (1.113, 1.486)        |
| Other cardiac disease history (valvular heart disease and angina) |         | 0.250              | 0.069 | 13.28                | <0.001  | 1.284        | (1.122, 1.468)        |
| History of stroke                                                 |         | 0.161              | 0.088 | 3.38                 | 0.066   | 1.175        | (0.989, 1.396)        |
| History of transient ischemic attack                              |         | 0.293              | 0.120 | 5.96                 | 0.015   | 1.341        | (1.059, 1.696)        |
| History of peripheral vascular disease                            |         | 0.358              | 0.072 | 25.01                | <0.001  | 1.430        | (1.243, 1.645)        |
| Baseline dialysis vintage (years)                                 |         | 0.018              | 0.006 | 8.98                 | 0.003   | 1.018        | (1.006, 1.030)        |
| Baseline vitamin D use                                            |         | -0.140             | 0.061 | 5.20                 | 0.023   | 0.870        | (0.771, 0.981)        |
| Baseline statin use                                               |         | -0.184             | 0.065 | 7.99                 | 0.005   | 0.832        | (0.732, 0.945)        |
| Baseline serum calcification propensity per 1 SD decrease         |         | 0.139              | 0.031 | 20.64                | <0.001  | <b>1.149</b> | <b>(1.082, 1.220)</b> |
| Baseline HDL per 1 SD increase                                    |         | 0.054              | 0.028 | 3.61                 | 0.058   | 1.055        | (0.998, 1.116)        |
| Baseline tobacco use (ref=never)                                  | Current | 0.512              | 0.079 | 42.32                | <0.001  | 1.669        | (1.430, 1.947)        |
|                                                                   | Former  | 0.127              | 0.066 | 3.72                 | 0.054   | 1.135        | (0.998, 1.291)        |
| History of heart failure                                          |         | 0.180              | 0.070 | 6.63                 | 0.010   | 1.197        | (1.044, 1.372)        |

<sup>a</sup> History of cardiac arrhythmia includes chronic atrial fibrillation/flutter, paroxysmal atrial fibrillation, ventricular tachycardia/fibrillation, automatic implantable cardioverter-defibrillator, pacemaker. p-value is from Cox proportional hazards regression model. □ Results are stratified by country and history of diabetes from interactive voice response system. □ Models exclude CKD-MBD bone parameters and albumin, adjusted using a backwards elimination procedure at significance level of 0.10. □ The number of observations used: 2747

**Supplementary Table S6:** multivariable adjusted Cox regression analysis in which T50 was included as a categorical variable (quintiles)

**Table 14-4.154.1. Results from Stratified (Country and History of Diabetes) Multivariate (Excluding CKD-MBD Bone Parameters and Albumin) Model Using Backwards Selection Procedure at Significance Level of 0.10 on Time to Primary Composite Endpoint (All-Cause Mortality, Myocardial Infarction, Hospitalization for Unstable Angina, Heart Failure or Peripheral Vascular Event) Serum Calcification Propensity Assessed as Categorical (Quintiles) Variable; Placebo Subjects**

|                                                                        |                       | Parameter Estimate | SE    | Chi-square Statistic | p-value | Hazard Ratio | 95% CI         |
|------------------------------------------------------------------------|-----------------------|--------------------|-------|----------------------|---------|--------------|----------------|
| Baseline serum calcification propensity quintiles (ref=Upper quintile) | Lower quintile        | 0.636              | 0.141 | 20.42                | <0.001  | 1.888        | (1.433, 2.488) |
|                                                                        | Lower middle quintile | 0.447              | 0.136 | 10.75                | 0.001   | 1.564        | (1.197, 2.044) |
|                                                                        | Middle quintile       | 0.221              | 0.139 | 2.54                 | 0.111   | 1.248        | (0.950, 1.638) |
|                                                                        | Upper middle quintile | 0.111              | 0.146 | 0.57                 | 0.449   | 1.117        | (0.839, 1.487) |
| Age (years)                                                            |                       | 0.036              | 0.004 | 92.86                | <0.001  | 1.037        | (1.029, 1.045) |
| History of heart failure                                               |                       | 0.306              | 0.102 | 8.99                 | 0.003   | 1.358        | (1.112, 1.658) |
| History of cardiac arrhythmia <sup>a</sup>                             |                       | 0.360              | 0.108 | 11.18                | <0.001  | 1.434        | (1.161, 1.771) |
| Other cardiac disease history (valvular heart disease and angina)      |                       | 0.297              | 0.102 | 8.52                 | 0.004   | 1.346        | (1.103, 1.644) |
| History of transient ischemic attack                                   |                       | 0.359              | 0.182 | 3.89                 | 0.049   | 1.432        | (1.002, 2.045) |
| History of peripheral vascular disease                                 |                       | 0.367              | 0.107 | 11.84                | <0.001  | 1.444        | (1.171, 1.780) |
| History of revascularization <sup>b</sup>                              |                       | 0.322              | 0.109 | 8.78                 | 0.003   | 1.380        | (1.115, 1.707) |
| Baseline dialysis vintage (years)                                      |                       | 0.023              | 0.009 | 7.48                 | 0.006   | 1.024        | (1.007, 1.041) |
|                                                                        |                       |                    |       |                      |         |              |                |
| Baseline LDL per 1 SD increase                                         |                       | 0.342              | 0.133 | 6.65                 | 0.010   | 1.408        | (1.086, 1.826) |
| Baseline HDL per 1 SD increase                                         |                       | 0.171              | 0.051 | 11.39                | <0.001  | 1.187        | (1.075, 1.311) |
| Baseline total cholesterol per 1 SD increase                           |                       | -0.491             | 0.139 | 12.43                | <0.001  | 0.612        | (0.466, 0.804) |
| Baseline tobacco use (ref=never)                                       | Current               | 0.545              | 0.116 | 22.07                | <0.001  | 1.725        | (1.374, 2.165) |
|                                                                        | Former                | 0.210              | 0.097 | 4.69                 | 0.030   | 1.234        | (1.020, 1.493) |

□

**Table 14-4.154.2. Results from Stratified (Country and History of Diabetes) Multivariate (Excluding CKD-MBD Bone Parameters and Albumin) Model Using Backwards Selection Procedure at Significance Level of 0.10 on Time to Primary Composite Endpoint (All-Cause Mortality, Myocardial Infarction, Hospitalization for Unstable Angina, Heart Failure or Peripheral Vascular Event) Serum Calcification Propensity Assessed as Categorical (Quintiles) Variable; Cinacalcet Subjects**

|                                                                        |                       | Parameter Estimate | SE    | Chi-square Statistic | p-value | Hazard Ratio | 95% CI         |
|------------------------------------------------------------------------|-----------------------|--------------------|-------|----------------------|---------|--------------|----------------|
| Baseline serum calcification propensity quintiles (ref=Upper quintile) | Lower quintile        | 0.133              | 0.134 | 0.99                 | 0.320   | 1.142        | (0.879, 1.484) |
|                                                                        | Lower middle quintile | 0.168              | 0.133 | 1.58                 | 0.208   | 1.182        | (0.911, 1.535) |
|                                                                        | Middle quintile       | 0.071              | 0.134 | 0.28                 | 0.596   | 1.074        | (0.825, 1.398) |
|                                                                        | Upper middle quintile | -0.051             | 0.137 | 0.14                 | 0.709   | 0.950        | (0.727, 1.243) |
| Age (years)                                                            |                       | 0.031              | 0.003 | 84.80                | <0.001  | 1.031        | (1.025, 1.038) |
| Blood pressure - systolic per 10 mmHg                                  |                       | 0.038              | 0.017 | 4.90                 | 0.027   | 1.038        | (1.004, 1.073) |
| History of coronary artery disease                                     |                       | 0.512              | 0.101 | 25.45                | <0.001  | 1.668        | (1.367, 2.035) |
| History of cardiac arrhythmia                                          |                       | 0.268              | 0.105 | 6.55                 | 0.010   | 1.307        | (1.065, 1.604) |
| Other cardiac disease history (valvular heart disease and angina)      |                       | 0.268              | 0.097 | 7.61                 | 0.006   | 1.307        | (1.081, 1.581) |
| History of stroke                                                      |                       | 0.247              | 0.129 | 3.69                 | 0.055   | 1.281        | (0.995, 1.648) |
| History of transient ischemic attack                                   |                       | 0.306              | 0.170 | 3.25                 | 0.072   | 1.358        | (0.973, 1.896) |
| History of peripheral vascular disease                                 |                       | 0.321              | 0.105 | 9.35                 | 0.002   | 1.379        | (1.122, 1.694) |
| History of dyslipidemia                                                |                       | -0.199             | 0.091 | 4.83                 | 0.028   | 0.819        | (0.686, 0.979) |
| Baseline tobacco use (ref=never)                                       | Current               | 0.510              | 0.113 | 20.20                | <0.001  | 1.665        | (1.333, 2.079) |
|                                                                        | Former                | 0.026              | 0.094 | 0.08                 | 0.779   | 1.027        | (0.854, 1.235) |

**Table 14-4.154.3. Results from Stratified (Country and History of Diabetes) Multivariate (Excluding CKD-MBD Bone Parameters and Albumin) Model Using Backwards Selection Procedure at Significance Level of 0.10 on Time to All-cause Mortality □ Serum Calcification Propensity Assessed as Categorical (Quintiles) Variable; Placebo Subjects**

|                                                                        |                       | Parameter Estimate | SE    | Chi-square Statistic | p-value | Hazard Ratio | 95% CI         |
|------------------------------------------------------------------------|-----------------------|--------------------|-------|----------------------|---------|--------------|----------------|
| Baseline serum calcification propensity quintiles (ref=Upper quintile) | Lower quintile        | 0.577              | 0.156 | 13.78                | <0.001  | 1.781        | (1.313, 2.416) |
|                                                                        | Lower middle quintile | 0.241              | 0.151 | 2.54                 | 0.111   | 1.273        | (0.946, 1.712) |
|                                                                        | Middle quintile       | 0.163              | 0.153 | 1.14                 | 0.286   | 1.177        | (0.872, 1.588) |
|                                                                        | Upper middle quintile | -0.019             | 0.166 | 0.01                 | 0.908   | 0.981        | (0.709, 1.358) |
| Age (years)                                                            |                       | 0.046              | 0.004 | 114.61               | <0.001  | 1.047        | (1.039, 1.056) |
| History of myocardial infarction                                       |                       | 0.216              | 0.134 | 2.62                 | 0.106   | 1.241        | (0.955, 1.613) |
| History of heart failure                                               |                       | 0.209              | 0.115 | 3.31                 | 0.069   | 1.232        | (0.984, 1.543) |
| History of cardiac arrhythmia <sup>a</sup>                             |                       | 0.387              | 0.118 | 10.69                | 0.001   | 1.472        | (1.168, 1.857) |
| Other cardiac disease history (valvular heart disease and angina)      |                       | 0.297              | 0.114 | 6.78                 | 0.009   | 1.346        | (1.076, 1.684) |
| History of transient ischemic attack                                   |                       | 0.678              | 0.190 | 12.71                | <0.001  | 1.971        | (1.357, 2.861) |
| History of peripheral vascular disease                                 |                       | 0.289              | 0.116 | 6.17                 | 0.013   | 1.336        | (1.063, 1.678) |
| Baseline dialysis vintage (years)                                      |                       | 0.031              | 0.010 | 10.40                | 0.001   | 1.031        | (1.012, 1.051) |
| Baseline LDL per 1 SD increase                                         |                       | 0.372              | 0.152 | 5.98                 | 0.014   | 1.450        | (1.077, 1.954) |
| Baseline HDL per 1 SD increase                                         |                       | 0.143              | 0.058 | 6.03                 | 0.014   | 1.154        | (1.029, 1.294) |
| Baseline total cholesterol per 1 SD increase                           |                       | -0.538             | 0.159 | 11.43                | <0.001  | 0.584        | (0.427, 0.798) |
| Baseline tobacco use (ref=never)                                       | Current               | 0.356              | 0.132 | 7.23                 | 0.007   | 1.427        | (1.101, 1.849) |
|                                                                        | Former                | 0.072              | 0.110 | 0.44                 | 0.508   | 1.075        | (0.867, 1.333) |



**Table 14-4.154.4. Results from Stratified (Country and History of Diabetes) Multivariate (Excluding CKD-MBD Bone Parameters and Albumin) Model Using Backwards Selection Procedure at Significance Level of 0.10 on Time to All-cause Mortality □ Serum Calcification Propensity Assessed as Categorical (Quintiles) Variable; Cinacalcet Subjects**

|                                                                        |                       | Parameter Estimate | SE    | Chi-square Statistic | p-value | Hazard Ratio | 95% CI         |
|------------------------------------------------------------------------|-----------------------|--------------------|-------|----------------------|---------|--------------|----------------|
| Baseline serum calcification propensity quintiles (ref=Upper quintile) | Lower quintile        | 0.134              | 0.156 | 0.74                 | 0.390   | 1.143        | (0.842, 1.552) |
|                                                                        | Lower middle quintile | 0.240              | 0.155 | 2.42                 | 0.120   | 1.272        | (0.939, 1.722) |
|                                                                        | Middle quintile       | 0.063              | 0.158 | 0.16                 | 0.690   | 1.065        | (0.781, 1.453) |
|                                                                        | Upper middle quintile | 0.035              | 0.158 | 0.05                 | 0.826   | 1.035        | (0.760, 1.410) |
| Age (years)                                                            |                       | 0.041              | 0.004 | 111.45               | <0.001  | 1.042        | (1.034, 1.050) |
| BMI (kg/m <sup>2</sup> )                                               |                       | -0.019             | 0.008 | 5.36                 | 0.021   | 0.982        | (0.966, 0.997) |
| History of myocardial infarction                                       |                       | 0.297              | 0.124 | 5.71                 | 0.017   | 1.346        | (1.055, 1.717) |
| History of heart failure                                               |                       | 0.334              | 0.111 | 9.05                 | 0.003   | 1.397        | (1.123, 1.736) |
| History of cardiac arrhythmia <sup>a</sup>                             |                       | 0.265              | 0.117 | 5.11                 | 0.024   | 1.303        | (1.036, 1.640) |
| History of stroke                                                      |                       | 0.308              | 0.144 | 4.54                 | 0.033   | 1.361        | (1.025, 1.806) |
| History of peripheral vascular disease                                 |                       | 0.380              | 0.117 | 10.59                | 0.001   | 1.462        | (1.163, 1.838) |
| Baseline tobacco use (ref=never)                                       | Current               | 0.343              | 0.137 | 6.28                 | 0.012   | 1.409        | (1.078, 1.842) |
|                                                                        | Former                | 0.075              | 0.108 | 0.48                 | 0.489   | 1.078        | (0.872, 1.333) |

**Table 14-4.154.5. Results from Stratified (Country and History of Diabetes) Multivariate (Excluding CKD-MBD Bone Parameters and Albumin) Model Using Backwards Selection Procedure at Significance Level of 0.10 on Time to Myocardial Infarction □ Serum Calcification Propensity Assessed as Categorical (Quintiles) Variable; Placebo Subjects**

|                                                                        |                       | Parameter Estimate | SE    | Chi-square Statistic | p-value | Hazard Ratio | 95% CI         |
|------------------------------------------------------------------------|-----------------------|--------------------|-------|----------------------|---------|--------------|----------------|
| Baseline serum calcification propensity quintiles (ref=Upper quintile) | Lower quintile        | 0.907              | 0.294 | 9.55                 | 0.002   | 2.477        | (1.393, 4.405) |
|                                                                        | Lower middle quintile | 0.441              | 0.294 | 2.25                 | 0.133   | 1.554        | (0.874, 2.766) |
|                                                                        | Middle quintile       | 0.069              | 0.316 | 0.05                 | 0.828   | 1.071        | (0.576, 1.990) |
|                                                                        | Upper middle quintile | 0.069              | 0.299 | 0.05                 | 0.819   | 1.071        | (0.596, 1.925) |
| Age (years)                                                            |                       | 0.035              | 0.008 | 20.96                | <0.001  | 1.036        | (1.020, 1.052) |
| History of myocardial infarction                                       |                       | 0.404              | 0.233 | 3.01                 | 0.083   | 1.497        | (0.949, 2.363) |
| History of peripheral vascular disease                                 |                       | 0.553              | 0.212 | 6.81                 | 0.009   | 1.739        | (1.148, 2.634) |
| Baseline dialysate calcium                                             |                       | 0.515              | 0.253 | 4.16                 | 0.041   | 1.674        | (1.020, 2.748) |
| Baseline statin use                                                    |                       | 0.401              | 0.206 | 3.80                 | 0.051   | 1.494        | (0.998, 2.236) |

**Table 14-4.154.6. Results from Stratified (Country and History of Diabetes) Multivariate (Excluding CKD-MBD Bone Parameters and Albumin) Model Using Backwards Selection Procedure at Significance Level of 0.10 on Time to Myocardial Infarction □ Serum Calcification Propensity Assessed as Categorical (Quintiles) Variable; Cinacalcet Subjects**

|                                                                        |                       | Parameter Estimate | SE    | Chi-square Statistic | p-value | Hazard Ratio | 95% CI         |
|------------------------------------------------------------------------|-----------------------|--------------------|-------|----------------------|---------|--------------|----------------|
| Baseline serum calcification propensity quintiles (ref=Upper quintile) | Lower quintile        | 0.792              | 0.303 | 6.84                 | 0.009   | 2.208        | (1.220, 3.998) |
|                                                                        | Lower middle quintile | 0.276              | 0.323 | 0.73                 | 0.392   | 1.318        | (0.700, 2.480) |
|                                                                        | Middle quintile       | 0.147              | 0.329 | 0.20                 | 0.656   | 1.158        | (0.608, 2.207) |
|                                                                        | Upper middle quintile | -0.024             | 0.317 | 0.01                 | 0.940   | 0.976        | (0.524, 1.818) |
| Age (years)                                                            |                       | 0.019              | 0.008 | 6.04                 | 0.014   | 1.019        | (1.004, 1.034) |
| Blood pressure - systolic per 10 mmHg                                  |                       | 0.115              | 0.038 | 9.28                 | 0.002   | 1.122        | (1.042, 1.208) |
| History of coronary artery disease                                     |                       | 0.823              | 0.205 | 16.16                | <0.001  | 2.277        | (1.525, 3.401) |
| History of transient ischemic attack                                   |                       | 0.836              | 0.327 | 6.52                 | 0.011   | 2.307        | (1.214, 4.383) |
| History of peripheral vascular disease                                 |                       | 0.556              | 0.215 | 6.67                 | 0.010   | 1.744        | (1.143, 2.661) |
| Baseline total cholesterol per 1 SD increase                           |                       | 0.233              | 0.094 | 6.10                 | 0.013   | 1.263        | (1.049, 1.519) |
| Baseline tobacco use (ref=never)                                       | Current               | 0.510              | 0.246 | 4.31                 | 0.038   | 1.666        | (1.029, 2.697) |
|                                                                        | Former                | 0.072              | 0.218 | 0.11                 | 0.741   | 1.075        | (0.701, 1.646) |

**Table 14-4.154.11. Results from Stratified (Country and History of Diabetes) Multivariate (Excluding CKD-MBD Bone Parameters and Albumin) Model Using Backwards Selection Procedure at Significance Level of 0.10 on Time to Peripheral Vascular Event □ Serum Calcification Propensity Assessed as Categorical (Quintiles) Variable; Placebo Subjects**

|                                                                        |                       | Parameter Estimate | SE    | Chi-square Statistic | p-value | Hazard Ratio | 95% CI         |
|------------------------------------------------------------------------|-----------------------|--------------------|-------|----------------------|---------|--------------|----------------|
| Baseline serum calcification propensity quintiles (ref=Upper quintile) | Lower quintile        | 0.740              | 0.321 | 5.31                 | 0.021   | 2.097        | (1.117, 3.935) |
|                                                                        | Lower middle quintile | 0.652              | 0.296 | 4.84                 | 0.028   | 1.920        | (1.074, 3.433) |
|                                                                        | Middle quintile       | -0.062             | 0.330 | 0.04                 | 0.851   | 0.940        | (0.493, 1.793) |
|                                                                        | Upper middle quintile | 0.148              | 0.321 | 0.21                 | 0.646   | 1.159        | (0.617, 2.176) |
| Age (years)                                                            |                       | 0.024              | 0.009 | 7.56                 | 0.006   | 1.024        | (1.007, 1.042) |
| History of coronary artery disease                                     |                       | 0.863              | 0.210 | 16.90                | <0.001  | 2.371        | (1.571, 3.578) |
| History of cardiac arrhythmia <sup>a</sup>                             |                       | 0.502              | 0.218 | 5.29                 | 0.021   | 1.652        | (1.077, 2.535) |
| History of peripheral vascular disease                                 |                       | 1.189              | 0.198 | 36.12                | <0.001  | 3.285        | (2.229, 4.841) |
| Baseline dialysate calcium                                             |                       | 0.401              | 0.251 | 2.55                 | 0.110   | 1.493        | (0.913, 2.442) |
| Baseline tobacco use (ref=never)                                       | Current               | 0.591              | 0.254 | 5.42                 | 0.020   | 1.805        | (1.098, 2.967) |
|                                                                        | Former                | 0.263              | 0.213 | 1.53                 | 0.217   | 1.301        | (0.857, 1.973) |

□

**Table 14-4.154.12. Results from Stratified (Country and History of Diabetes) Multivariate (Excluding CKD-MBD Bone Parameters and Albumin) Model Using Backwards Selection Procedure at Significance Level of 0.10 on Time to Peripheral Vascular Event □ Serum Calcification Propensity Assessed as Categorical (Quintiles) Variable; Cinacalcet Subjects**

|                                                                        |                       | Parameter Estimate | SE    | Chi-square Statistic | p-value | Hazard Ratio | 95% CI         |
|------------------------------------------------------------------------|-----------------------|--------------------|-------|----------------------|---------|--------------|----------------|
| Baseline serum calcification propensity quintiles (ref=Upper quintile) | Lower quintile        | 0.268              | 0.332 | 0.65                 | 0.419   | 1.308        | (0.682, 2.505) |
|                                                                        | Lower middle quintile | 0.378              | 0.332 | 1.29                 | 0.255   | 1.459        | (0.761, 2.798) |
|                                                                        | Middle quintile       | -0.162             | 0.352 | 0.21                 | 0.645   | 0.851        | (0.427, 1.695) |
|                                                                        | Upper middle quintile | 0.115              | 0.332 | 0.12                 | 0.729   | 1.122        | (0.586, 2.149) |
| Race group (ref=White)                                                 | Black                 | 0.330              | 0.293 | 1.27                 | 0.259   | 1.391        | (0.784, 2.468) |
|                                                                        | Other                 | -0.875             | 0.394 | 4.93                 | 0.026   | 0.417        | (0.192, 0.902) |
| History of coronary artery disease                                     |                       | 0.847              | 0.217 | 15.24                | <0.001  | 2.333        | (1.525, 3.571) |
| History of cardiac arrhythmia <sup>a</sup>                             |                       | 1.019              | 0.228 | 19.96                | <0.001  | 2.769        | (1.771, 4.329) |
| History of peripheral vascular disease                                 |                       | 1.080              | 0.224 | 23.25                | <0.001  | 2.945        | (1.898, 4.568) |
| Baseline LDL per 1 SD increase                                         |                       | 0.245              | 0.099 | 6.12                 | 0.013   | 1.277        | (1.052, 1.550) |

**Table 14-4.154.15. Results from Stratified (Country and History of Diabetes) Multivariate (Excluding CKD-MBD Bone Parameters and Albumin) Model Using Backwards Selection Procedure at Significance Level of 0.10 on Time to Tertiary Cardiovascular Composite (Cardiovascular Mortality, Myocardial Infarction, Hospitalization for Unstable Angina and Heart Failure) □ Serum Calcification Propensity Assessed as Categorical (Quintiles) Variable; Placebo Subjects**

|                                                                        |                       | Parameter Estimate | SE    | Chi-square Statistic | p-value | Hazard Ratio | 95% CI         |
|------------------------------------------------------------------------|-----------------------|--------------------|-------|----------------------|---------|--------------|----------------|
| Baseline serum calcification propensity quintiles (ref=Upper quintile) | Lower quintile        | 0.678              | 0.176 | 14.87                | <0.001  | 1.970        | (1.396, 2.781) |
|                                                                        | Lower middle quintile | 0.522              | 0.170 | 9.39                 | 0.002   | 1.685        | (1.207, 2.353) |
|                                                                        | Middle quintile       | 0.337              | 0.174 | 3.75                 | 0.053   | 1.401        | (0.996, 1.971) |
|                                                                        | Upper middle quintile | 0.274              | 0.177 | 2.40                 | 0.121   | 1.316        | (0.930, 1.861) |
| Age (years)                                                            |                       | 0.034              | 0.004 | 59.32                | <0.001  | 1.035        | (1.026, 1.044) |
| History of myocardial infarction                                       |                       | 0.270              | 0.146 | 3.44                 | 0.064   | 1.310        | (0.985, 1.743) |
| History of heart failure                                               |                       | 0.282              | 0.123 | 5.21                 | 0.022   | 1.325        | (1.041, 1.688) |
| History of cardiac arrhythmia <sup>a</sup>                             |                       | 0.320              | 0.131 | 5.98                 | 0.014   | 1.378        | (1.066, 1.781) |
| Other cardiac disease history (valvular heart disease and angina)      |                       | 0.502              | 0.121 | 17.38                | <0.001  | 1.653        | (1.305, 2.093) |
| History of revascularization <sup>b</sup>                              |                       | 0.214              | 0.130 | 2.73                 | 0.099   | 1.239        | (0.961, 1.598) |
| Baseline vitamin D use                                                 |                       | -0.190             | 0.112 | 2.89                 | 0.089   | 0.827        | (0.664, 1.029) |
| Baseline LDL per 1 SD increase                                         |                       | 0.367              | 0.161 | 5.18                 | 0.023   | 1.443        | (1.052, 1.979) |
| Baseline HDL per 1 SD increase                                         |                       | 0.199              | 0.061 | 10.78                | 0.001   | 1.220        | (1.084, 1.374) |
| Baseline total cholesterol per 1 SD increase                           |                       | -0.582             | 0.167 | 12.12                | <0.001  | 0.559        | (0.403, 0.775) |
| Baseline tobacco use (ref=never)                                       | Current               | 0.664              | 0.135 | 24.30                | <0.001  | 1.943        | (1.492, 2.530) |

**Table 14-4.154.16. Results from Stratified (Country and History of Diabetes) Multivariate (Excluding CKD-MBD Bone Parameters and Albumin) Model Using Backwards Selection Procedure at Significance Level of 0.10 on Time to Tertiary Cardiovascular Composite (Cardiovascular Mortality, Myocardial Infarction, Hospitalization for Unstable Angina and Heart Failure) □ Serum Calcification Propensity Assessed as Categorical (Quintiles) Variable; Cinacalcet Subjects**

|                                                                        |                       | Parameter Estimate | SE    | Chi-square Statistic | p-value | Hazard Ratio | 95% CI         |
|------------------------------------------------------------------------|-----------------------|--------------------|-------|----------------------|---------|--------------|----------------|
| Baseline serum calcification propensity quintiles (ref=Upper quintile) | Lower quintile        | 0.224              | 0.176 | 1.62                 | 0.204   | 1.251        | (0.886, 1.767) |
|                                                                        | Lower middle quintile | 0.319              | 0.173 | 3.39                 | 0.066   | 1.376        | (0.979, 1.932) |
|                                                                        | Middle quintile       | 0.209              | 0.176 | 1.40                 | 0.236   | 1.232        | (0.872, 1.741) |
|                                                                        | Upper middle quintile | -0.191             | 0.184 | 1.08                 | 0.299   | 0.826        | (0.576, 1.185) |
| Age (years)                                                            |                       | 0.029              | 0.004 | 47.46                | <0.001  | 1.030        | (1.021, 1.038) |
| BMI (kg/m <sup>2</sup> )                                               |                       | -0.014             | 0.008 | 2.73                 | 0.099   | 0.986        | (0.970, 1.003) |
| Blood pressure - systolic per 10 mmHg                                  |                       | 0.077              | 0.021 | 13.28                | <0.001  | 1.080        | (1.036, 1.126) |
| History of heart failure                                               |                       | 0.260              | 0.122 | 4.57                 | 0.033   | 1.297        | (1.022, 1.646) |
| History of coronary artery disease                                     |                       | 0.598              | 0.119 | 25.17                | <0.001  | 1.818        | (1.439, 2.296) |
| History of transient ischemic attack                                   |                       | 0.407              | 0.222 | 3.37                 | 0.066   | 1.502        | (0.973, 2.319) |
| History of peripheral vascular disease                                 |                       | 0.275              | 0.130 | 4.49                 | 0.034   | 1.317        | (1.021, 1.698) |
| Baseline calcium-containing phosphate binder use                       |                       | -0.225             | 0.110 | 4.16                 | 0.041   | 0.798        | (0.643, 0.991) |
| Baseline LDL per 1 SD increase                                         |                       | 0.120              | 0.054 | 4.98                 | 0.026   | 1.127        | (1.015, 1.253) |
| Baseline tobacco use (ref=never)                                       | Current               | 0.616              | 0.145 | 18.14                | <0.001  | 1.852        | (1.395, 2.460) |
|                                                                        | Former                | 0.117              | 0.120 | 0.96                 | 0.328   | 1.125        | (0.889, 1.423) |

Suppl. Figure S1: Distribution of  $T_{50}$  values in the EVOLVE study at baseline

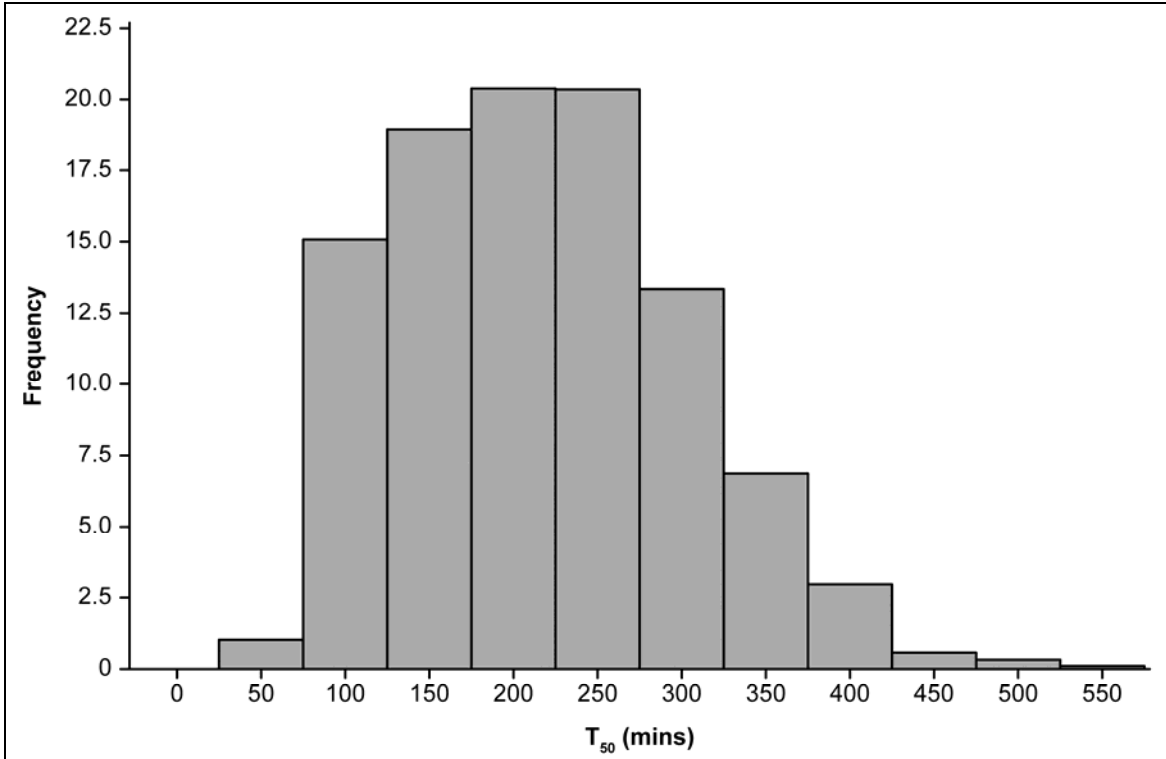



Suppl. Figure S2: Kaplan Meier plots of a) all-cause mortality b) myocardial infarction c) peripheral vascular event and d) tertiary cardiovascular composite endpoint by T<sub>50</sub> quintiles within each treatment group.

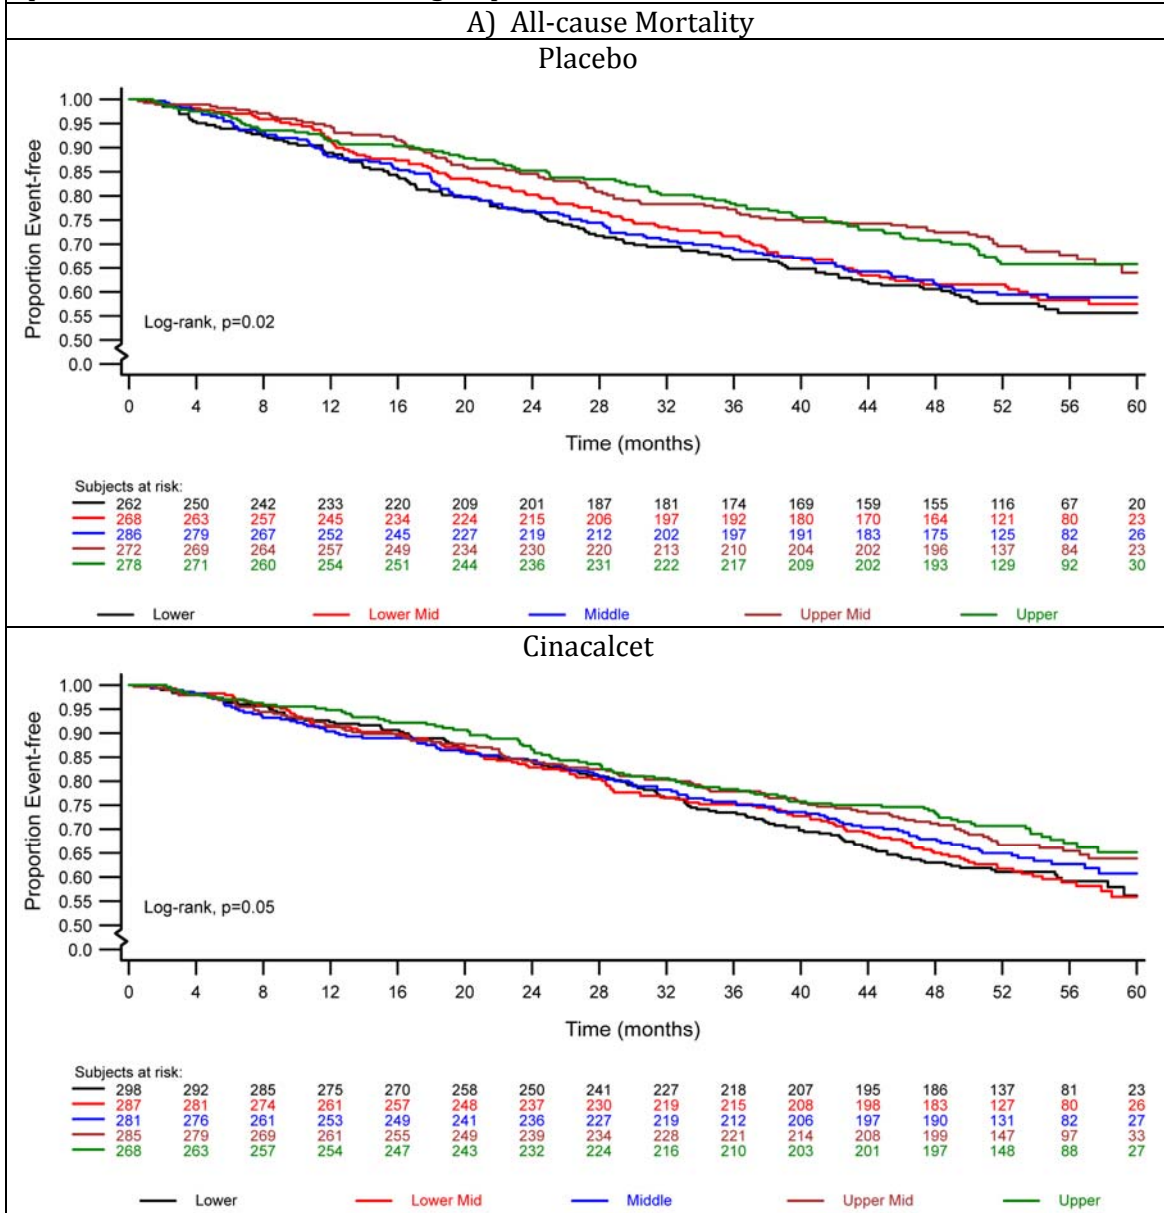

### B) Myocardial Infarction

Placebo

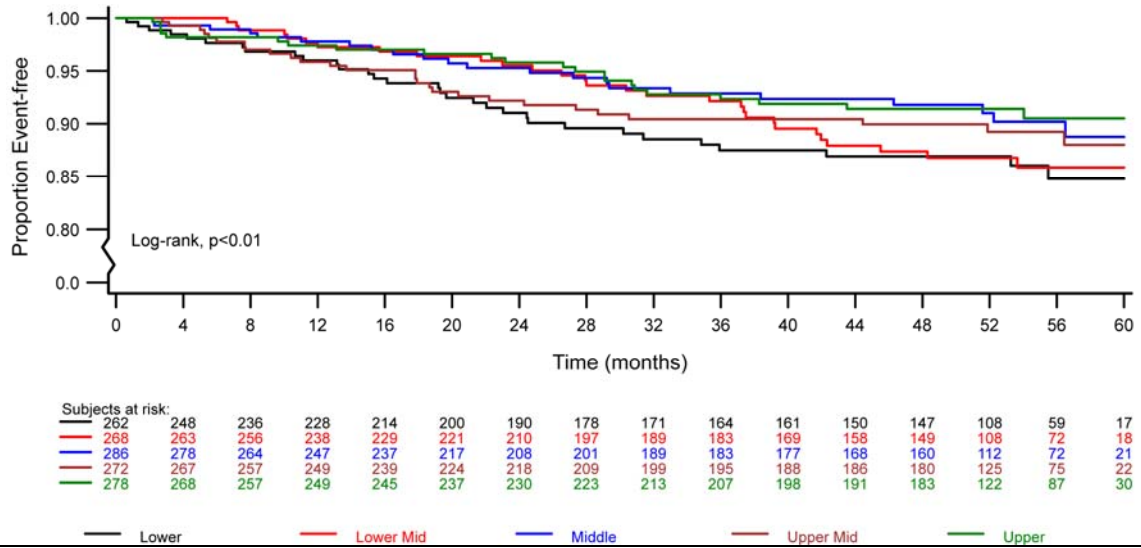

Cinacalcet

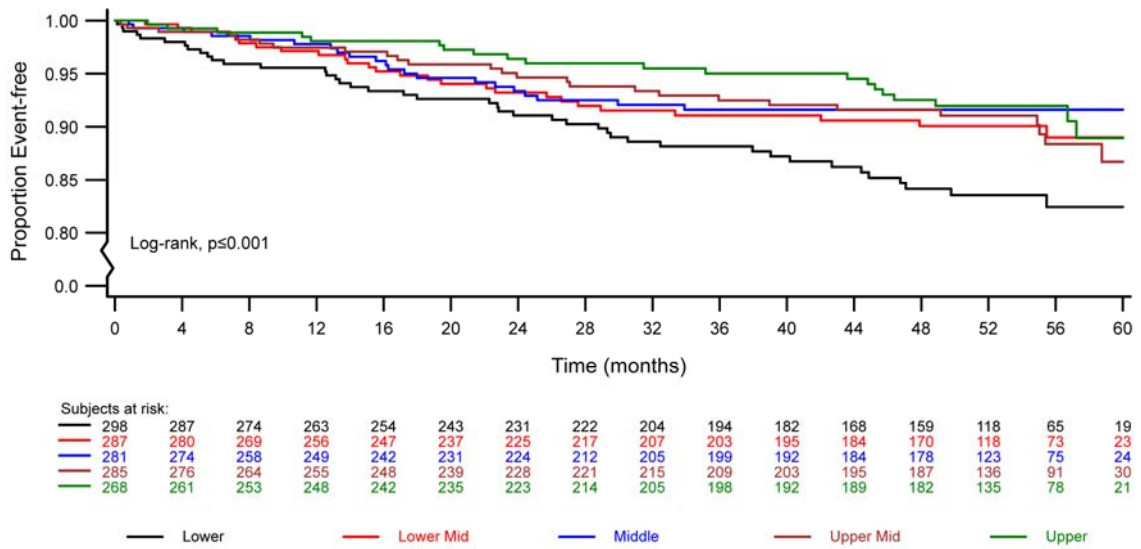

### C) Peripheral Vascular Event

Placebo

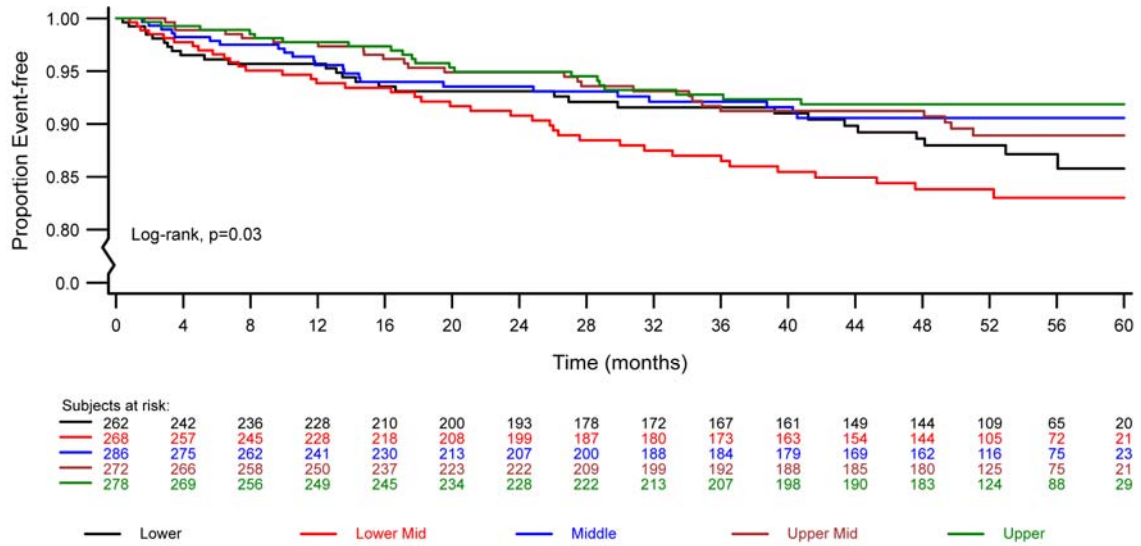

Cinacalcet

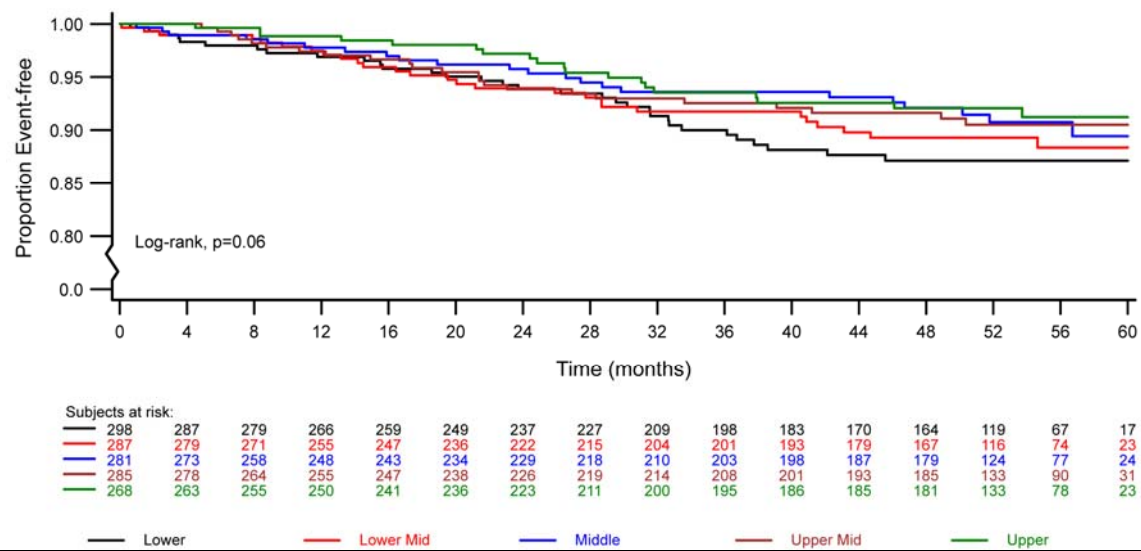

D) Tertiary Cardiovascular Composite

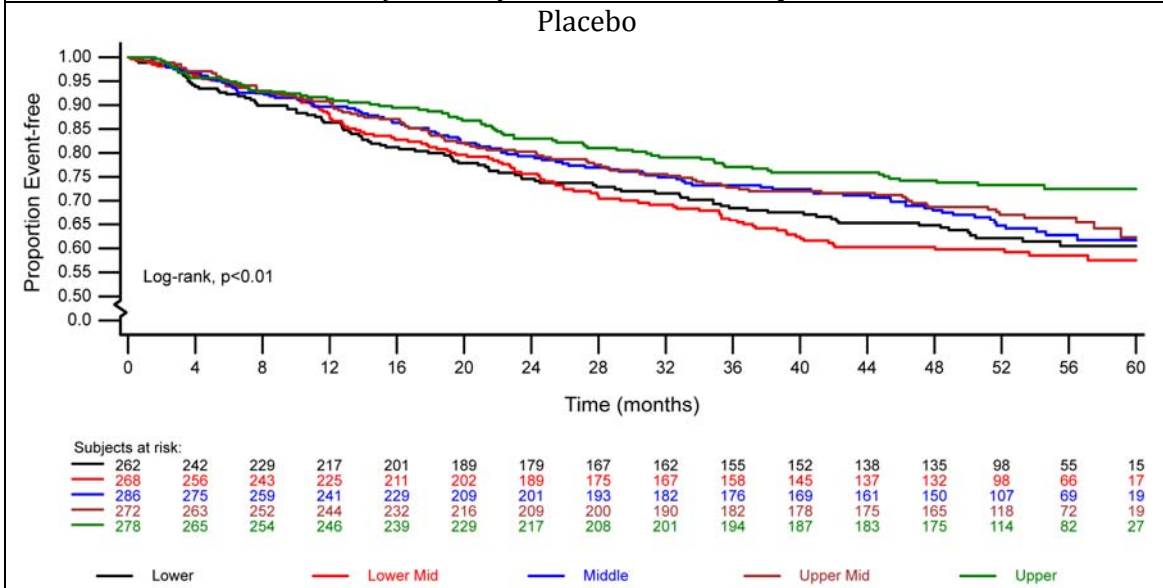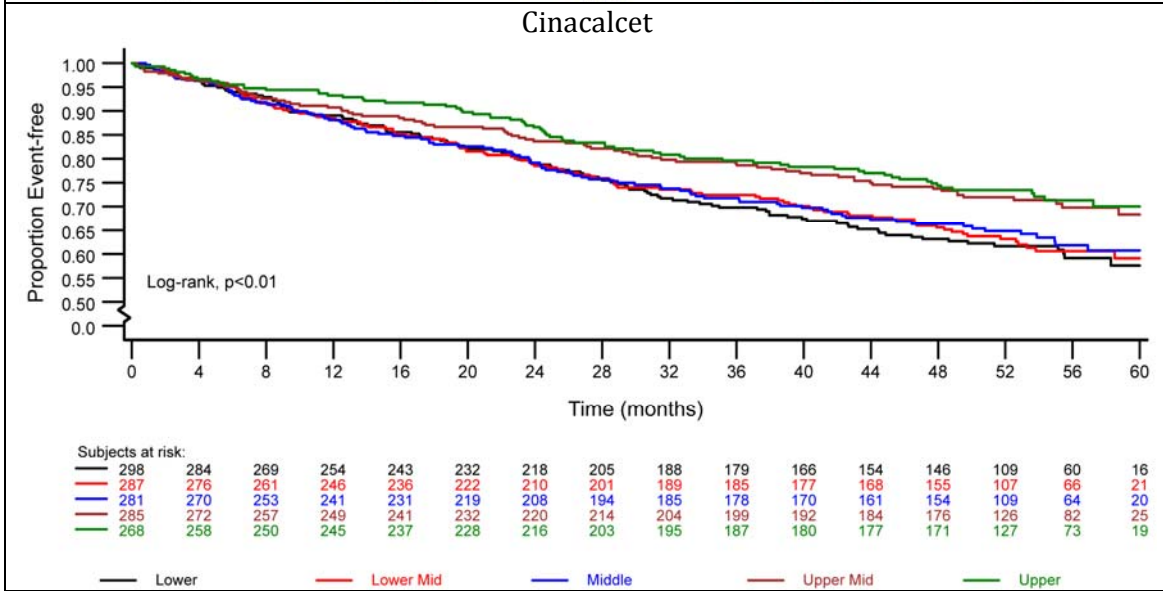

A) Primary Composite Endpoint  
Placebo

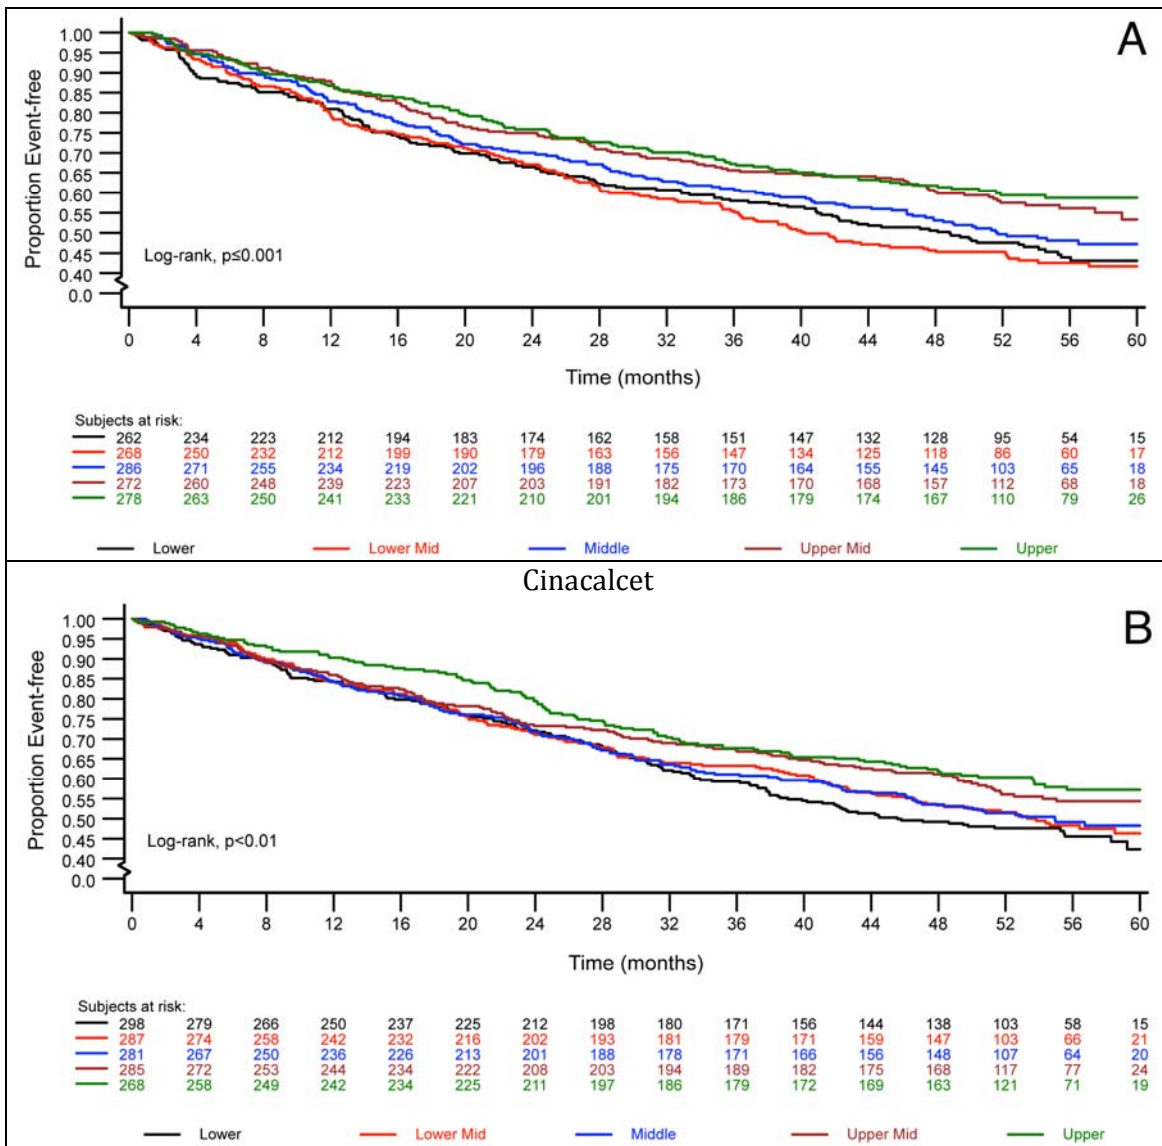

The following table lists the precise log-rank p-values of the Kaplan Meier Curves shown above.

|                                | Cinacalcet group | Placebo group | Whole T <sub>50</sub> cohort |
|--------------------------------|------------------|---------------|------------------------------|
| Primary composite endpoint     | 0.005            | <0.001        | <0.001                       |
| All-cause mortality            | 0.052            | 0.015         | <0.001                       |
| Myocardial infarction          | <0.001           | 0.007         | <0.001                       |
| Unstable angina                | 0.095            | 0.979         | 0.256                        |
| Heart failure                  | 0.848            | 0.246         | 0.395                        |
| Peripheral vascular events     | 0.059            | 0.025         | <0.001                       |
| CV mortality                   | 0.072            | 0.108         | 0.009                        |
| Stroke                         | 0.119            | 0.149         | 0.037                        |
| Bone fractures                 | 0.110            | 0.220         | 0.034                        |
| Parathyroidectomy              | 0.134            | 0.035         | 0.019                        |
| Tertiary CV composite endpoint | 0.003            | 0.002         | <0.001                       |

Suppl. Figure S3: Schematic representation of the T<sub>50</sub> test and influencing factors in the current study.

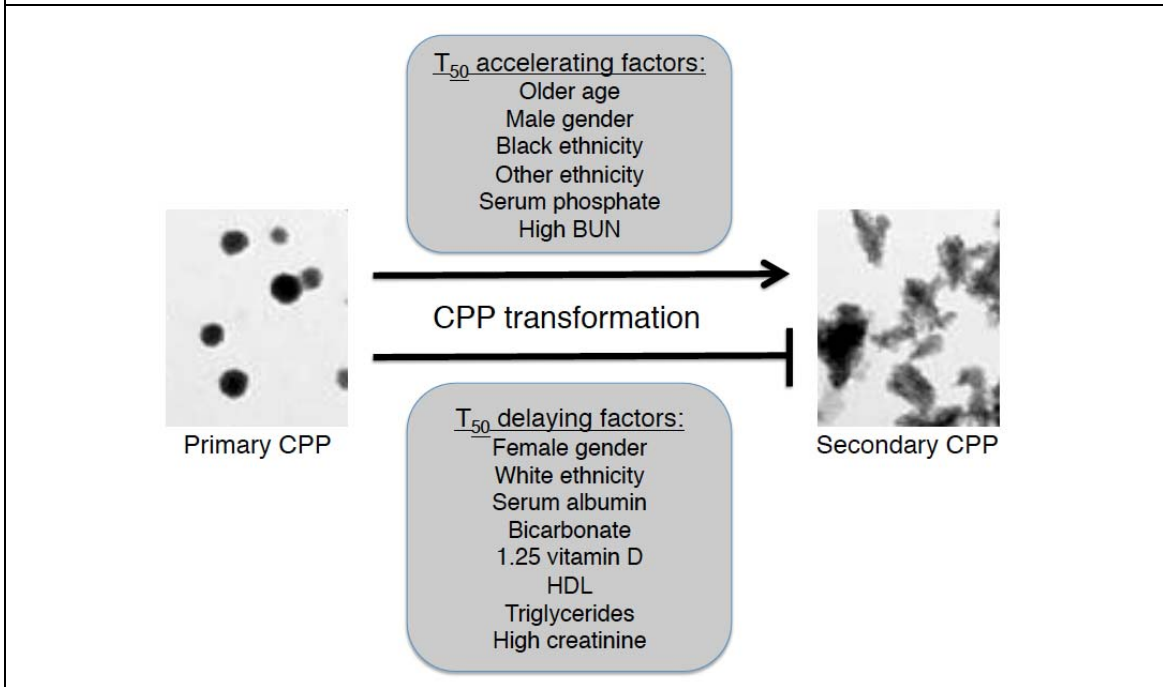

Suppl. Figure S4: Schematic representation of the T<sub>50</sub> test and influencing factors in the current study.

Concentrated calcium solution, serum and concentrated phosphate solution are mixed at room temperature. This leads to the spontaneous formation of primary calciprotein particles (CPP). Incubation at 37°C induces the spontaneous transformation of prim.CPP to sec.CPP. The time point of this transformation depends on the calcification resistive forces of the tested serum. The transformation time point is currently measured nephelometrically. Earlier precipitation /transformation indicates low calcification resistance and is associated with worse clinical outcome. Later precipitation / transformation indicates high calcification resistance and is associated with better clinical outcome. Outcome associated with T<sub>50</sub> so far in kidney patients: all-cause mortality, cardiovascular mortality, renal graft failure, myocardial infarction, peripheral vascular events, progression of pulse wave velocity acceleration. For further detailed information about the T<sub>50</sub> test, please refer to Pasch et al., JASN , 2012. The term „calcification propensity“ more precisely refers to the ability of serum to delay the formation of sec.CPP (nanocrystals) in the in vitro setting.

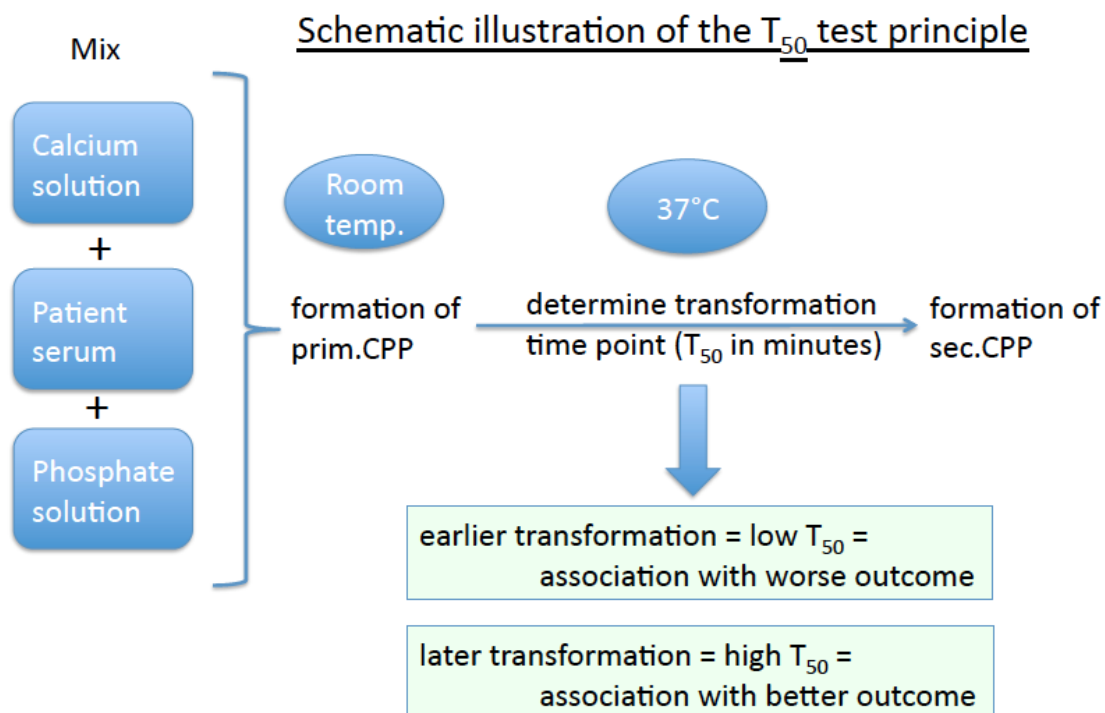

Supplement: CJN.04720416SupplementaryData.pdf [file CJN.04720416SupplementaryData.pdf]
